# Supplementary material for: Two Sets of Simple Formulae to Estimating Fractal Dimension of Irregular Boundaries
Source: Hindawi journal article supplement (doi:10.1155/2020/7528703), 2020-02-26
Supplement: f1 [file 7528703.f1.zip]

Archive with 2 entries (2 files):
- File 1_Datasets for the fractal indexes based on urban area-perimeter relations of Beijing-Tianjin-Hebei Region 2020-01-18.xlsx
- File 2_Datasets for the fractal indexes based on urban area-perimeter relations of Yangtze River Delta 2019-09-14.xlsx
