# Supplementary material for: Two Sets of Simple Formulae to Estimating Fractal Dimension of Irregular Boundaries
Source: Hindawi journal article supplement (doi:10.1155/2020/7528703), 2020-02-26
Supplement: f1 [file 7528703.f1.zip › File 1_Datasets for the fractal indexes based on urban area-perimeter relations of Beijing-Tianjin-Hebei Region 2020-01-18.xlsx]

## Sheet: 2000
City	Measure in 2000		Fractal dimension 1					Fractal dimension 2					Shape index					Adjusted boundary dimension (I)					Form dimension (I)					Adjusted boundary dimension (II)					Form dimension (II)
	Perimeter P	Area A	Triangle	Square	Hexagon	Circle	Hexagram	Triangle	Square	Hexagon	Circle	Hexagram	Triangle	Square	Hexagon	Circle	Hexagram	Triangle	Square	Hexagon	Circle	Hexagram	Triangle	Square	Hexagon	Circle	Hexagram	Triangle	Square	Hexagon	Circle	Hexagram	Triangle	Square	Hexagon	Circle	Hexagram
Beijing	1851.16	1633.74	1.56029	1.65903	1.779	1.81829	1.75236	1.44229	1.47938	1.50061	1.51537	1.40358	0.00990912	0.00762804	0.00660608	0.00599105	0.0132122	1.28014	1.32952	1.3895	1.40914	1.37618	1.78116	1.75215	1.71968	1.70965	1.72665	1.22114	1.23969	1.2503	1.25769	1.20179	1.8189	1.80665	1.79981	1.79511	1.83209
Tianjin	1867.59	850.63	1.69691	1.82215	1.98254	2.03331	1.98016	1.54034	1.58268	1.60696	1.62389	1.49632	0.00506899	0.00390211	0.00337933	0.00306471	0.00675865	1.34845	1.41108	1.49127	1.51665	1.49008	1.74159	1.70868	1.67057	1.65935	1.6711	1.27017	1.29134	1.30348	1.31194	1.24816	1.7873	1.77439	1.76718	1.76223	1.80118
Shijiazhuang	671.251	329.699	1.63087	1.76705	1.94796	2.00766	1.93927	1.47393	1.51892	1.54484	1.56297	1.42743	0.0152086	0.0117076	0.0101391	0.00919511	0.0202781	1.31543	1.38353	1.47398	1.50383	1.46963	1.76021	1.72279	1.67844	1.66497	1.68044	1.23696	1.25946	1.27242	1.28148	1.21372	1.80843	1.79399	1.7859	1.78034	1.82392
Tangshan	720.865	214.202	1.76722	1.93562	2.17069	2.2465	2.2025	1.56656	1.61692	1.646	1.66637	1.5147	0.00856755	0.0065953	0.0057117	0.00517994	0.0114234	1.38361	1.46781	1.58534	1.62325	1.60125	1.72275	1.68129	1.63078	1.61605	1.62451	1.28328	1.30846	1.323	1.33319	1.25735	1.77925	1.76426	1.75586	1.75008	1.79532
Qinhuangdao	429.071	121.168	1.76176	1.9492	2.22249	2.31283	2.27146	1.54803	1.60153	1.63256	1.65433	1.49318	0.0136795	0.0105305	0.00911969	0.00827065	0.0182394	1.38088	1.4746	1.61125	1.65642	1.63573	1.72418	1.67815	1.62064	1.60371	1.61135	1.27402	1.30077	1.31628	1.32716	1.24659	1.78492	1.76878	1.75972	1.75349	1.80219
Handan	497.276	165.917	1.71827	1.88706	2.12542	2.20395	2.15052	1.52452	1.57511	1.60438	1.6249	1.47252	0.0139457	0.0107354	0.00929712	0.00843155	0.0185942	1.35913	1.44353	1.56271	1.60197	1.57526	1.73576	1.69275	1.63991	1.62423	1.63482	1.26226	1.28755	1.30219	1.31245	1.23626	1.79223	1.77667	1.76794	1.76194	1.80889
Xingtai	402.171	125.875	1.72709	1.90706	2.1673	2.25386	2.20368	1.52408	1.57649	1.60687	1.62819	1.47033	0.0161755	0.0124519	0.0107837	0.0097797	0.0215673	1.36355	1.45353	1.58365	1.62693	1.60184	1.73338	1.68798	1.63145	1.61465	1.62428	1.26204	1.28825	1.30344	1.3141	1.23517	1.79237	1.77625	1.7672	1.76098	1.80961
Baoding	648.915	165.693	1.80816	1.99173	2.25422	2.33894	2.30511	1.59013	1.64291	1.67345	1.69485	1.53588	0.00817844	0.00629576	0.00545229	0.00494468	0.0109046	1.40408	1.49587	1.62711	1.66947	1.65255	1.71221	1.66851	1.61459	1.59899	1.60512	1.29507	1.32145	1.33672	1.34742	1.26794	1.77216	1.75674	1.7481	1.74216	1.78868
Zhuangjiakou	181.218	53.7583	1.70117	1.91412	2.24967	2.36767	2.32373	1.48167	1.53904	1.57251	1.5961	1.42333	0.034024	0.0261917	0.0226826	0.0205709	0.0453653	1.35059	1.45706	1.62483	1.68384	1.66187	1.74042	1.68631	1.61545	1.59388	1.60173	1.24083	1.26952	1.28626	1.29805	1.21166	1.80591	1.7877	1.77745	1.77039	1.82531
Chengde	383.228	83.3696	1.84402	2.06287	2.39692	2.50766	2.49605	1.59534	1.65335	1.68707	1.71078	1.53609	0.0117987	0.00908266	0.00786581	0.0071335	0.0157316	1.42201	1.53144	1.69846	1.75383	1.74802	1.70323	1.65298	1.58877	1.57018	1.57207	1.29767	1.32667	1.34353	1.35539	1.26804	1.77061	1.75377	1.74431	1.7378	1.78862
Cangzhou	359.765	96.5368	1.77064	1.96903	2.26474	2.36341	2.32754	1.54796	1.60312	1.63515	1.65765	1.49153	0.0155023	0.0119337	0.0103349	0.0093727	0.0206698	1.38532	1.48451	1.63237	1.68171	1.66377	1.72186	1.67362	1.61261	1.59463	1.60104	1.27398	1.30156	1.31757	1.32883	1.24577	1.78494	1.76831	1.75897	1.75254	1.80272
Langfang	288.817	96.114	1.69076	1.8747	2.14583	2.23802	2.18047	1.49105	1.54421	1.57508	1.59677	1.43666	0.0239487	0.0184357	0.0159658	0.0144794	0.0319316	1.34538	1.43735	1.57291	1.61901	1.59024	1.74328	1.69573	1.63576	1.61766	1.62884	1.24552	1.2721	1.28754	1.29839	1.21833	1.80287	1.7861	1.77667	1.77019	1.82079
Hengshui	286.536	86.769	1.7204	1.91411	2.20386	2.30222	2.25406	1.50927	1.56384	1.59556	1.61786	1.4535	0.0219659	0.0169093	0.0146439	0.0132806	0.0292878	1.3602	1.45705	1.60193	1.65111	1.62703	1.73519	1.68632	1.62425	1.60565	1.61462	1.25464	1.28192	1.29778	1.30893	1.22675	1.79704	1.78008	1.77055	1.76398	1.81516
Avearage	660.605	309.497	1.72289	1.89644	2.14697	2.23033	2.18361	1.52578	1.57673	1.60623	1.62692	1.47347	0.0152287	0.011723	0.0101525	0.00920726	0.0203049	1.36144	1.44822	1.57349	1.61517	1.5918	1.73502	1.69133	1.63715	1.62105	1.63051	1.26289	1.28837	1.30312	1.31346	1.23673	1.79207	1.77644	1.76766	1.76163	1.80881

## Sheet: 2005
City	Measure in 2005		Fractal dimension 1					Fractal dimension 2					Shape index					Adjusted boundary dimension (I)					Form dimension (I)					Adjusted boundary dimension (II)					Form dimension (II)
	Perimeter P	Area A	Triangle	Square	Hexagon	Circle	Hexagram	Triangle	Square	Hexagon	Circle	Hexagram	Triangle	Square	Hexagon	Circle	Hexagram	Triangle	Square	Hexagon	Circle	Hexagram	Triangle	Square	Hexagon	Circle	Hexagram	Triangle	Square	Hexagon	Circle	Hexagram	Triangle	Square	Hexagon	Circle	Hexagram
Beijing	2638.74	2372.62	1.57501	1.6706	1.78563	1.82289	1.76136	1.45809	1.49427	1.51494	1.52931	1.42028	0.00708236	0.005452	0.00472157	0.00428199	0.00944315	1.28751	1.3353	1.39281	1.41145	1.38068	1.77669	1.74889	1.71797	1.70849	1.72428	1.22905	1.24714	1.25747	1.26465	1.21014	1.81364	1.80184	1.79525	1.79073	1.82635
Tianjin	2428.37	1595.28	1.63091	1.73799	1.87015	1.91237	1.85443	1.49773	1.53635	1.55844	1.57382	1.45745	0.00562278	0.00432842	0.00374852	0.00339953	0.00749704	1.31546	1.369	1.43508	1.45618	1.42722	1.76019	1.73046	1.69683	1.68673	1.70066	1.24887	1.26817	1.27922	1.28691	1.22873	1.80073	1.78853	1.78173	1.77706	1.81385
Shijiazhuang	796.105	389.841	1.64085	1.77461	1.95091	2.00865	1.94303	1.48439	1.52884	1.55442	1.5723	1.43841	0.0127846	0.00984163	0.0085231	0.0077296	0.0170462	1.32042	1.38731	1.47545	1.50432	1.47151	1.75733	1.72082	1.67776	1.66475	1.67957	1.2422	1.26442	1.27721	1.28615	1.21921	1.80503	1.79088	1.78296	1.77751	1.82021
Tangshan	744.837	226.183	1.76231	1.92826	2.15888	2.23321	2.18807	1.56422	1.61416	1.643	1.66319	1.51275	0.00847383	0.00652316	0.00564922	0.00512328	0.0112984	1.38115	1.46413	1.57944	1.6166	1.59403	1.72403	1.683	1.63314	1.61858	1.62734	1.28211	1.30708	1.3215	1.3316	1.25637	1.77997	1.76506	1.75671	1.75098	1.79594
Qinhuangdao	451.546	159.447	1.69718	1.86382	2.09909	2.17714	2.11915	1.5082	1.5585	1.58761	1.60802	1.45651	0.0162538	0.0125122	0.0108359	0.00982707	0.0216718	1.34859	1.43191	1.54955	1.58857	1.55958	1.74152	1.69837	1.64535	1.6295	1.6412	1.2541	1.27925	1.29381	1.30401	1.22825	1.79738	1.78171	1.77291	1.76687	1.81416
Handan	587.48	176.986	1.75526	1.92793	2.17188	2.25134	2.20565	1.55314	1.60426	1.63382	1.65454	1.50056	0.0106585	0.0082049	0.00710565	0.00644411	0.0142113	1.37763	1.46396	1.58594	1.62567	1.60283	1.72589	1.68308	1.63054	1.61513	1.6239	1.27657	1.30213	1.31691	1.32727	1.25028	1.78335	1.76797	1.75935	1.75343	1.79982
Xingtai	391.324	128.221	1.71188	1.88853	2.14301	2.22789	2.17393	1.51358	1.5655	1.5956	1.61671	1.46032	0.0174032	0.013397	0.0116021	0.010522	0.0232043	1.35594	1.44427	1.5715	1.61395	1.58696	1.7375	1.69239	1.63633	1.6196	1.63013	1.25679	1.28275	1.2978	1.30836	1.23016	1.79568	1.77957	1.77054	1.76432	1.8129
Baoding	614.516	177.62	1.76917	1.94397	2.19134	2.27165	2.2289	1.56341	1.61485	1.6446	1.66544	1.51051	0.00977616	0.00752569	0.00651744	0.00591066	0.0130349	1.38458	1.47198	1.59567	1.63582	1.61445	1.72224	1.67935	1.6267	1.61131	1.61941	1.28171	1.30742	1.3223	1.33272	1.25526	1.78021	1.76486	1.75626	1.75034	1.79665
Zhuangjiakou	186.204	55.4021	1.7018	1.91328	2.24526	2.36174	2.3171	1.48304	1.5402	1.57355	1.59704	1.42488	0.0332117	0.0255664	0.0221412	0.0200798	0.0442823	1.3509	1.45664	1.62263	1.68087	1.65855	1.74025	1.68651	1.61628	1.59493	1.60294	1.24152	1.2701	1.28678	1.29852	1.21244	1.80546	1.78734	1.77714	1.77011	1.82478
Chengde	386.877	82.2602	1.85234	2.07344	2.4117	2.52376	2.51502	1.60076	1.65907	1.69297	1.71681	1.5412	0.0114232	0.00879354	0.00761543	0.00690643	0.0152309	1.42617	1.53672	1.70585	1.76188	1.75751	1.70118	1.65074	1.58622	1.56758	1.56899	1.30038	1.32953	1.34649	1.3584	1.2706	1.76901	1.75214	1.74267	1.73616	1.78703
Cangzhou	411.08	111.027	1.77407	1.96718	2.25141	2.34551	2.30833	1.55444	1.60879	1.64033	1.66247	1.49876	0.0136558	0.0105122	0.00910383	0.00825626	0.0182077	1.38704	1.48359	1.62571	1.67275	1.65416	1.72096	1.67404	1.61512	1.59782	1.60453	1.27722	1.3044	1.32016	1.33123	1.24938	1.78295	1.76664	1.75748	1.75118	1.8004
Langfang	292.507	99.8148	1.68368	1.86483	2.13056	2.22091	2.16119	1.487	1.53974	1.57036	1.59187	1.43302	0.0242473	0.0186656	0.0161649	0.0146599	0.0323298	1.34184	1.43241	1.56528	1.61046	1.58059	1.74524	1.69812	1.63886	1.62094	1.63267	1.2435	1.26987	1.28518	1.29594	1.21651	1.80418	1.78748	1.7781	1.77164	1.82202
Hengshui	217.321	81.6262	1.63491	1.81506	2.08252	2.17565	2.10329	1.44731	1.50009	1.53078	1.55236	1.39341	0.0359226	0.0276532	0.0239484	0.0217188	0.0478968	1.31746	1.40753	1.54126	1.58782	1.55164	1.75904	1.71046	1.64882	1.62979	1.64448	1.22366	1.25004	1.26539	1.27618	1.1967	1.81722	1.79997	1.79027	1.78359	1.83563
Avearage	780.531	435.102	1.70687	1.87458	2.1148	2.19482	2.14457	1.51656	1.56651	1.59542	1.61568	1.46524	0.0158858	0.0122289	0.0105906	0.00960457	0.0211811	1.35344	1.43729	1.5574	1.59741	1.57229	1.73939	1.69663	1.64384	1.62809	1.63847	1.25828	1.28325	1.29771	1.30784	1.23262	1.79498	1.77954	1.77087	1.76492	1.81152

## Sheet: 2010
City	Measure in 2010		Fractal dimension 1					Fractal dimension 2					Shape index					Adjusted boundary dimension (I)					Form dimension (I)					Adjusted boundary dimension (II)					Form dimension (II)
	Perimeter P	Area A	Triangle	Square	Hexagon	Circle	Hexagram	Triangle	Square	Hexagon	Circle	Hexagram	Triangle	Square	Hexagon	Circle	Hexagram	Triangle	Square	Hexagon	Circle	Hexagram	Triangle	Square	Hexagon	Circle	Hexagram	Triangle	Square	Hexagon	Circle	Hexagram	Triangle	Square	Hexagon	Circle	Hexagram
Beijing	3256.71	2890.85	1.58747	1.682	1.79533	1.83179	1.77289	1.47016	1.50597	1.52641	1.54061	1.4327	0.00566511	0.004361	0.00377674	0.00342513	0.00755348	1.29373	1.341	1.39767	1.4159	1.38645	1.77296	1.74571	1.71548	1.70627	1.72127	1.23508	1.25298	1.2632	1.27031	1.21635	1.80966	1.79809	1.79164	1.78721	1.82213
Tianjin	2480.17	2029.36	1.58947	1.68861	1.80891	1.84776	1.78672	1.46785	1.50482	1.52595	1.54065	1.42924	0.00685707	0.00527857	0.00457138	0.00414578	0.00914275	1.29474	1.34431	1.40446	1.42388	1.39336	1.77236	1.74388	1.71202	1.70231	1.71769	1.23393	1.25241	1.26297	1.27032	1.21462	1.81042	1.79846	1.79178	1.7872	1.8233
Shijiazhuang	852.565	446.206	1.62866	1.75779	1.92634	1.98157	1.91488	1.47745	1.52101	1.54607	1.56358	1.43234	0.0127592	0.00982201	0.00850611	0.00771419	0.0170122	1.31433	1.3789	1.46317	1.49078	1.45744	1.76084	1.72522	1.68345	1.67079	1.68614	1.23873	1.26051	1.27304	1.28179	1.21617	1.80728	1.79333	1.78552	1.78016	1.82225
Tangshan	771.567	264.459	1.73035	1.88685	2.10113	2.17036	2.11896	1.54401	1.59238	1.6203	1.63982	1.4941	0.00923321	0.00710773	0.00615547	0.0055824	0.0123109	1.36517	1.44343	1.55056	1.58518	1.55948	1.73251	1.6928	1.64493	1.63084	1.64124	1.272	1.29619	1.31015	1.31991	1.24705	1.78616	1.77149	1.76327	1.75763	1.80189
Qinhuangdao	403.878	173.931	1.63535	1.78915	2.0026	2.07439	2.00311	1.46496	1.51328	1.54124	1.56082	1.41526	0.0221625	0.0170607	0.014775	0.0133994	0.02955	1.31768	1.39458	1.5013	1.5372	1.50156	1.75891	1.71706	1.66609	1.65053	1.66598	1.23248	1.25664	1.27062	1.28041	1.20763	1.81137	1.79577	1.78702	1.781	1.82807
Handan	587.48	176.986	1.75526	1.92793	2.17188	2.25134	2.20565	1.55314	1.60426	1.63382	1.65454	1.50056	0.0106585	0.0082049	0.00710565	0.00644411	0.0142113	1.37763	1.46396	1.58594	1.62567	1.60283	1.72589	1.68308	1.63054	1.61513	1.6239	1.27657	1.30213	1.31691	1.32727	1.25028	1.78335	1.76797	1.75935	1.75343	1.79982
Xingtai	386.521	132.791	1.69709	1.86995	2.11765	2.20046	2.14282	1.50377	1.55512	1.58488	1.60575	1.45108	0.0184741	0.0142214	0.0123161	0.0111694	0.0246321	1.34855	1.43498	1.55883	1.60023	1.57141	1.74154	1.69688	1.64151	1.62491	1.63637	1.25189	1.27756	1.29244	1.30288	1.22554	1.79879	1.78274	1.77373	1.76753	1.81597
Baoding	618.411	181.76	1.76451	1.93779	2.18243	2.26187	2.21801	1.56058	1.61177	1.64137	1.66211	1.50791	0.00987835	0.00760436	0.00658557	0.00597245	0.0131711	1.38226	1.4689	1.59122	1.63093	1.609	1.72345	1.68078	1.62845	1.61315	1.6215	1.28029	1.30589	1.32069	1.33106	1.25396	1.78107	1.76576	1.75718	1.75128	1.79748
Zhuangjiakou	249.436	90.73	1.65414	1.83363	2.09813	2.18921	2.12191	1.46357	1.51617	1.54672	1.5682	1.4098	0.0303092	0.023332	0.0202061	0.0183249	0.0404122	1.32707	1.41682	1.54906	1.5946	1.56095	1.75354	1.70581	1.64555	1.62712	1.64063	1.23179	1.25808	1.27336	1.2841	1.2049	1.81183	1.79486	1.78532	1.77876	1.82995
Chengde	385.729	85.9915	1.83569	2.05145	2.37943	2.48813	2.47314	1.59048	1.64806	1.68153	1.70505	1.53164	0.0120125	0.00924722	0.00800832	0.00726275	0.0160166	1.41784	1.52573	1.68971	1.74407	1.73657	1.7053	1.65543	1.59182	1.57337	1.57585	1.29524	1.32403	1.34076	1.35253	1.26582	1.77206	1.75527	1.74584	1.73936	1.79
Cangzhou	387.137	107.908	1.76148	1.95352	2.23642	2.33047	2.29044	1.54463	1.59884	1.6303	1.65239	1.4891	0.0149646	0.0115198	0.00997643	0.00904762	0.0199529	1.38074	1.47676	1.61821	1.66523	1.64522	1.72425	1.67716	1.61797	1.60052	1.60782	1.27231	1.29942	1.31515	1.3262	1.24455	1.78597	1.76957	1.76037	1.75404	1.8035
Langfang	285.468	101.981	1.66814	1.84563	2.10482	2.19321	2.12923	1.47647	1.52868	1.559	1.58029	1.42302	0.0260105	0.0200229	0.0173403	0.0157259	0.0346807	1.33407	1.42282	1.55241	1.59661	1.56462	1.74958	1.70283	1.64416	1.62633	1.63913	1.23823	1.26434	1.2795	1.29014	1.21151	1.8076	1.79093	1.78156	1.77511	1.82542
Hengshui	275.642	109.724	1.63343	1.80197	2.04496	2.12832	2.05518	1.45343	1.50433	1.53387	1.5546	1.4013	0.0300161	0.0231064	0.0200107	0.0181477	0.0400214	1.31672	1.40099	1.52248	1.56416	1.52759	1.75947	1.71378	1.65682	1.63932	1.65463	1.22672	1.25217	1.26693	1.2773	1.20065	1.81518	1.79862	1.78931	1.7829	1.83288
Avearage	841.593	522.513	1.68777	1.84818	2.07462	2.14991	2.09484	1.50542	1.55421	1.58242	1.60219	1.45524	0.016077	0.0123761	0.010718	0.00972014	0.021436	1.34389	1.42409	1.53731	1.57496	1.54742	1.74466	1.70311	1.65221	1.63697	1.64863	1.25271	1.2771	1.29121	1.30109	1.22762	1.79852	1.7833	1.77476	1.76889	1.81482

## Sheet: Fractal index I
City	2000					2005					2010
	Triangle	Square	Hexagon	Circle	Hexagram	Triangle	Square	Hexagon	Circle	Hexagram	Triangle	Square	Hexagon	Circle	Hexagram
Baoding	1.80816	1.99173	2.25422	2.33894	2.30511	1.76917	1.94397	2.19134	2.27165	2.2289	1.76451	1.93779	2.18243	2.26187	2.21801
Beijing	1.56029	1.65903	1.779	1.81829	1.75236	1.57501	1.6706	1.78563	1.82289	1.76136	1.58747	1.682	1.79533	1.83179	1.77289
Cangzhou	1.77064	1.96903	2.26474	2.36341	2.32754	1.77407	1.96718	2.25141	2.34551	2.30833	1.76148	1.95352	2.23642	2.33047	2.29044
Chengde	1.84402	2.06287	2.39692	2.50766	2.49605	1.85234	2.07344	2.4117	2.52376	2.51502	1.83569	2.05145	2.37943	2.48813	2.47314
Handan	1.71827	1.88706	2.12542	2.20395	2.15052	1.75526	1.92793	2.17188	2.25134	2.20565	1.75526	1.92793	2.17188	2.25134	2.20565
Hengshui	1.7204	1.91411	2.20386	2.30222	2.25406	1.63491	1.81506	2.08252	2.17565	2.10329	1.63343	1.80197	2.04496	2.12832	2.05518
Langfang	1.69076	1.8747	2.14583	2.23802	2.18047	1.68368	1.86483	2.13056	2.22091	2.16119	1.66814	1.84563	2.10482	2.19321	2.12923
Qinhuangdao	1.76176	1.9492	2.22249	2.31283	2.27146	1.69718	1.86382	2.09909	2.17714	2.11915	1.63535	1.78915	2.0026	2.07439	2.00311
Shijiazhuang	1.63087	1.76705	1.94796	2.00766	1.93927	1.64085	1.77461	1.95091	2.00865	1.94303	1.62866	1.75779	1.92634	1.98157	1.91488
Tangshan	1.76722	1.93562	2.17069	2.2465	2.2025	1.76231	1.92826	2.15888	2.23321	2.18807	1.73035	1.88685	2.10113	2.17036	2.11896
Tianjin	1.69691	1.82215	1.98254	2.03331	1.98016	1.63091	1.73799	1.87015	1.91237	1.85443	1.58947	1.68861	1.80891	1.84776	1.78672
Xingtai	1.72709	1.90706	2.1673	2.25386	2.20368	1.71188	1.88853	2.14301	2.22789	2.17393	1.69709	1.86995	2.11765	2.20046	2.14282
Zhuangjiakou	1.70117	1.91412	2.24967	2.36767	2.32373	1.7018	1.91328	2.24526	2.36174	2.3171	1.65414	1.83363	2.09813	2.18921	2.12191
Average	1.72289	1.89644	2.14697	2.23033	2.18361	1.70687	1.87458	2.1148	2.19482	2.14457	1.68777	1.84818	2.07462	2.14991	2.09484

## Sheet: Adjusted fractal index I
City	2000					2005					2010
	Triangle	Square	Hexagon	Circle	Hexagram	Triangle	Square	Hexagon	Circle	Hexagram	Triangle	Square	Hexagon	Circle	Hexagram
Baoding	1.40408	1.49587	1.62711	1.66947	1.65255	1.38458	1.47198	1.59567	1.63582	1.61445	1.38226	1.4689	1.59122	1.63093	1.609
Beijing	1.28014	1.32952	1.3895	1.40914	1.37618	1.28751	1.3353	1.39281	1.41145	1.38068	1.29373	1.341	1.39767	1.4159	1.38645
Cangzhou	1.38532	1.48451	1.63237	1.68171	1.66377	1.38704	1.48359	1.62571	1.67275	1.65416	1.38074	1.47676	1.61821	1.66523	1.64522
Chengde	1.42201	1.53144	1.69846	1.75383	1.74802	1.42617	1.53672	1.70585	1.76188	1.75751	1.41784	1.52573	1.68971	1.74407	1.73657
Handan	1.35913	1.44353	1.56271	1.60197	1.57526	1.37763	1.46396	1.58594	1.62567	1.60283	1.37763	1.46396	1.58594	1.62567	1.60283
Hengshui	1.3602	1.45705	1.60193	1.65111	1.62703	1.31746	1.40753	1.54126	1.58782	1.55164	1.31672	1.40099	1.52248	1.56416	1.52759
Langfang	1.34538	1.43735	1.57291	1.61901	1.59024	1.34184	1.43241	1.56528	1.61046	1.58059	1.33407	1.42282	1.55241	1.59661	1.56462
Qinhuangdao	1.38088	1.4746	1.61125	1.65642	1.63573	1.34859	1.43191	1.54955	1.58857	1.55958	1.31768	1.39458	1.5013	1.5372	1.50156
Shijiazhuang	1.31543	1.38353	1.47398	1.50383	1.46963	1.32042	1.38731	1.47545	1.50432	1.47151	1.31433	1.3789	1.46317	1.49078	1.45744
Tangshan	1.38361	1.46781	1.58534	1.62325	1.60125	1.38115	1.46413	1.57944	1.6166	1.59403	1.36517	1.44343	1.55056	1.58518	1.55948
Tianjin	1.34845	1.41108	1.49127	1.51665	1.49008	1.31546	1.369	1.43508	1.45618	1.42722	1.29474	1.34431	1.40446	1.42388	1.39336
Xingtai	1.36355	1.45353	1.58365	1.62693	1.60184	1.35594	1.44427	1.5715	1.61395	1.58696	1.34855	1.43498	1.55883	1.60023	1.57141
Zhuangjiakou	1.35059	1.45706	1.62483	1.68384	1.66187	1.3509	1.45664	1.62263	1.68087	1.65855	1.32707	1.41682	1.54906	1.5946	1.56095
Avearage	1.36144	1.44822	1.57349	1.61517	1.5918	1.35344	1.43729	1.5574	1.59741	1.57229	1.34389	1.42409	1.53731	1.57496	1.54742

## Sheet: Fractal index II
City	2000					2005					2010
	Triangle	Square	Hexagon	Circle	Hexagram	Triangle	Square	Hexagon	Circle	Hexagram	Triangle	Square	Hexagon	Circle	Hexagram
Baoding	1.59013	1.64291	1.67345	1.69485	1.53588	1.56341	1.61485	1.6446	1.66544	1.51051	1.56058	1.61177	1.64137	1.66211	1.50791
Beijing	1.44229	1.47938	1.50061	1.51537	1.40358	1.45809	1.49427	1.51494	1.52931	1.42028	1.47016	1.50597	1.52641	1.54061	1.4327
Cangzhou	1.54796	1.60312	1.63515	1.65765	1.49153	1.55444	1.60879	1.64033	1.66247	1.49876	1.54463	1.59884	1.6303	1.65239	1.4891
Chengde	1.59534	1.65335	1.68707	1.71078	1.53609	1.60076	1.65907	1.69297	1.71681	1.5412	1.59048	1.64806	1.68153	1.70505	1.53164
Handan	1.52452	1.57511	1.60438	1.6249	1.47252	1.55314	1.60426	1.63382	1.65454	1.50056	1.55314	1.60426	1.63382	1.65454	1.50056
Hengshui	1.50927	1.56384	1.59556	1.61786	1.4535	1.44731	1.50009	1.53078	1.55236	1.39341	1.45343	1.50433	1.53387	1.5546	1.4013
Langfang	1.49105	1.54421	1.57508	1.59677	1.43666	1.487	1.53974	1.57036	1.59187	1.43302	1.47647	1.52868	1.559	1.58029	1.42302
Qinhuangdao	1.54803	1.60153	1.63256	1.65433	1.49318	1.5082	1.5585	1.58761	1.60802	1.45651	1.46496	1.51328	1.54124	1.56082	1.41526
Shijiazhuang	1.47393	1.51892	1.54484	1.56297	1.42743	1.48439	1.52884	1.55442	1.5723	1.43841	1.47745	1.52101	1.54607	1.56358	1.43234
Tangshan	1.56656	1.61692	1.646	1.66637	1.5147	1.56422	1.61416	1.643	1.66319	1.51275	1.54401	1.59238	1.6203	1.63982	1.4941
Tianjin	1.54034	1.58268	1.60696	1.62389	1.49632	1.49773	1.53635	1.55844	1.57382	1.45745	1.46785	1.50482	1.52595	1.54065	1.42924
Xingtai	1.52408	1.57649	1.60687	1.62819	1.47033	1.51358	1.5655	1.5956	1.61671	1.46032	1.50377	1.55512	1.58488	1.60575	1.45108
Zhuangjiakou	1.48167	1.53904	1.57251	1.5961	1.42333	1.48304	1.5402	1.57355	1.59704	1.42488	1.46357	1.51617	1.54672	1.5682	1.4098
Average	1.52578	1.57673	1.60623	1.62692	1.47347	1.51656	1.56651	1.59542	1.61568	1.46524	1.50542	1.55421	1.58242	1.60219	1.45524

## Sheet: Adjusted fractal index II
City	2000					2005					2010
	Triangle	Square	Hexagon	Circle	Hexagram	Triangle	Square	Hexagon	Circle	Hexagram	Triangle	Square	Hexagon	Circle	Hexagram
Baoding	1.29507	1.32145	1.33672	1.34742	1.26794	1.28171	1.30742	1.3223	1.33272	1.25526	1.28029	1.30589	1.32069	1.33106	1.25396
Beijing	1.22114	1.23969	1.2503	1.25769	1.20179	1.22905	1.24714	1.25747	1.26465	1.21014	1.23508	1.25298	1.2632	1.27031	1.21635
Cangzhou	1.27398	1.30156	1.31757	1.32883	1.24577	1.27722	1.3044	1.32016	1.33123	1.24938	1.27231	1.29942	1.31515	1.3262	1.24455
Chengde	1.29767	1.32667	1.34353	1.35539	1.26804	1.30038	1.32953	1.34649	1.3584	1.2706	1.29524	1.32403	1.34076	1.35253	1.26582
Handan	1.26226	1.28755	1.30219	1.31245	1.23626	1.27657	1.30213	1.31691	1.32727	1.25028	1.27657	1.30213	1.31691	1.32727	1.25028
Hengshui	1.25464	1.28192	1.29778	1.30893	1.22675	1.22366	1.25004	1.26539	1.27618	1.1967	1.22672	1.25217	1.26693	1.2773	1.20065
Langfang	1.24552	1.2721	1.28754	1.29839	1.21833	1.2435	1.26987	1.28518	1.29594	1.21651	1.23823	1.26434	1.2795	1.29014	1.21151
Qinhuangdao	1.27402	1.30077	1.31628	1.32716	1.24659	1.2541	1.27925	1.29381	1.30401	1.22825	1.23248	1.25664	1.27062	1.28041	1.20763
Shijiazhuang	1.23696	1.25946	1.27242	1.28148	1.21372	1.2422	1.26442	1.27721	1.28615	1.21921	1.23873	1.26051	1.27304	1.28179	1.21617
Tangshan	1.28328	1.30846	1.323	1.33319	1.25735	1.28211	1.30708	1.3215	1.3316	1.25637	1.272	1.29619	1.31015	1.31991	1.24705
Tianjin	1.27017	1.29134	1.30348	1.31194	1.24816	1.24887	1.26817	1.27922	1.28691	1.22873	1.23393	1.25241	1.26297	1.27032	1.21462
Xingtai	1.26204	1.28825	1.30344	1.3141	1.23517	1.25679	1.28275	1.2978	1.30836	1.23016	1.25189	1.27756	1.29244	1.30288	1.22554
Zhuangjiakou	1.24083	1.26952	1.28626	1.29805	1.21166	1.24152	1.2701	1.28678	1.29852	1.21244	1.23179	1.25808	1.27336	1.2841	1.2049
Average	1.26289	1.28837	1.30312	1.31346	1.23673	1.25828	1.28325	1.29771	1.30784	1.23262	1.25271	1.2771	1.29121	1.30109	1.22762

## Sheet: Shape index
City	2000					2005					2010
	Triangle	Square	Hexagon	Circle	Hexagram	Triangle	Square	Hexagon	Circle	Hexagram	Triangle	Square	Hexagon	Circle	Hexagram
Baoding	0.00817844	0.00629576	0.00545229	0.00494468	0.0109046	0.00977616	0.00752569	0.00651744	0.00591066	0.0130349	0.00987835	0.00760436	0.00658557	0.00597245	0.0131711
Beijing	0.00990912	0.00762804	0.00660608	0.00599105	0.0132122	0.00708236	0.005452	0.00472157	0.00428199	0.00944315	0.00566511	0.004361	0.00377674	0.00342513	0.00755348
Cangzhou	0.0155023	0.0119337	0.0103349	0.0093727	0.0206698	0.0136558	0.0105122	0.00910383	0.00825626	0.0182077	0.0149646	0.0115198	0.00997643	0.00904762	0.0199529
Chengde	0.0117987	0.00908266	0.00786581	0.0071335	0.0157316	0.0114232	0.00879354	0.00761543	0.00690643	0.0152309	0.0120125	0.00924722	0.00800832	0.00726275	0.0160166
Handan	0.0139457	0.0107354	0.00929712	0.00843155	0.0185942	0.0106585	0.0082049	0.00710565	0.00644411	0.0142113	0.0106585	0.0082049	0.00710565	0.00644411	0.0142113
Hengshui	0.0219659	0.0169093	0.0146439	0.0132806	0.0292878	0.0359226	0.0276532	0.0239484	0.0217188	0.0478968	0.0300161	0.0231064	0.0200107	0.0181477	0.0400214
Langfang	0.0239487	0.0184357	0.0159658	0.0144794	0.0319316	0.0242473	0.0186656	0.0161649	0.0146599	0.0323298	0.0260105	0.0200229	0.0173403	0.0157259	0.0346807
Qinhuangdao	0.0136795	0.0105305	0.00911969	0.00827065	0.0182394	0.0162538	0.0125122	0.0108359	0.00982707	0.0216718	0.0221625	0.0170607	0.014775	0.0133994	0.02955
Shijiazhuang	0.0152086	0.0117076	0.0101391	0.00919511	0.0202781	0.0127846	0.00984163	0.0085231	0.0077296	0.0170462	0.0127592	0.00982201	0.00850611	0.00771419	0.0170122
Tangshan	0.00856755	0.0065953	0.0057117	0.00517994	0.0114234	0.00847383	0.00652316	0.00564922	0.00512328	0.0112984	0.00923321	0.00710773	0.00615547	0.0055824	0.0123109
Tianjin	0.00506899	0.00390211	0.00337933	0.00306471	0.00675865	0.00562278	0.00432842	0.00374852	0.00339953	0.00749704	0.00685707	0.00527857	0.00457138	0.00414578	0.00914275
Xingtai	0.0161755	0.0124519	0.0107837	0.0097797	0.0215673	0.0174032	0.013397	0.0116021	0.010522	0.0232043	0.0184741	0.0142214	0.0123161	0.0111694	0.0246321
Zhuangjiakou	0.034024	0.0261917	0.0226826	0.0205709	0.0453653	0.0332117	0.0255664	0.0221412	0.0200798	0.0442823	0.0303092	0.023332	0.0202061	0.0183249	0.0404122
Average	0.0152287	0.011723	0.0101525	0.00920726	0.0203049	0.0158858	0.0122289	0.0105906	0.00960457	0.0211811	0.016077	0.0123761	0.010718	0.00972014	0.021436

## Sheet: Form dimension I
City	Form dimension					Form dimension					Form dimension
	Triangle	Square	Hexagon	Circle	Hexagram	Triangle	Square	Hexagon	Circle	Hexagram	Triangle	Square	Hexagon	Circle	Hexagram
Baoding	1.71221	1.66851	1.61459	1.59899	1.60512	1.72224	1.67935	1.6267	1.61131	1.61941	1.72345	1.68078	1.62845	1.61315	1.6215
Beijing	1.78116	1.75215	1.71968	1.70965	1.72665	1.77669	1.74889	1.71797	1.70849	1.72428	1.77296	1.74571	1.71548	1.70627	1.72127
Cangzhou	1.72186	1.67362	1.61261	1.59463	1.60104	1.72096	1.67404	1.61512	1.59782	1.60453	1.72425	1.67716	1.61797	1.60052	1.60782
Chengde	1.70323	1.65298	1.58877	1.57018	1.57207	1.70118	1.65074	1.58622	1.56758	1.56899	1.7053	1.65543	1.59182	1.57337	1.57585
Handan	1.73576	1.69275	1.63991	1.62423	1.63482	1.72589	1.68308	1.63054	1.61513	1.6239	1.72589	1.68308	1.63054	1.61513	1.6239
Hengshui	1.73519	1.68632	1.62425	1.60565	1.61462	1.75904	1.71046	1.64882	1.62979	1.64448	1.75947	1.71378	1.65682	1.63932	1.65463
Langfang	1.74328	1.69573	1.63576	1.61766	1.62884	1.74524	1.69812	1.63886	1.62094	1.63267	1.74958	1.70283	1.64416	1.62633	1.63913
Qinhuangdao	1.72418	1.67815	1.62064	1.60371	1.61135	1.74152	1.69837	1.64535	1.6295	1.6412	1.75891	1.71706	1.66609	1.65053	1.66598
Shijiazhuang	1.76021	1.72279	1.67844	1.66497	1.68044	1.75733	1.72082	1.67776	1.66475	1.67957	1.76084	1.72522	1.68345	1.67079	1.68614
Tangshan	1.72275	1.68129	1.63078	1.61605	1.62451	1.72403	1.683	1.63314	1.61858	1.62734	1.73251	1.6928	1.64493	1.63084	1.64124
Tianjin	1.74159	1.70868	1.67057	1.65935	1.6711	1.76019	1.73046	1.69683	1.68673	1.70066	1.77236	1.74388	1.71202	1.70231	1.71769
Xingtai	1.73338	1.68798	1.63145	1.61465	1.62428	1.7375	1.69239	1.63633	1.6196	1.63013	1.74154	1.69688	1.64151	1.62491	1.63637
Zhuangjiakou	1.74042	1.68631	1.61545	1.59388	1.60173	1.74025	1.68651	1.61628	1.59493	1.60294	1.75354	1.70581	1.64555	1.62712	1.64063
Avearage	1.73502	1.69133	1.63715	1.62105	1.63051	1.73939	1.69663	1.64384	1.62809	1.63847	1.74466	1.70311	1.65221	1.63697	1.64863

## Sheet: Form dimension II
City	Form dimension					Form dimension					Form dimension
	Triangle	Square	Hexagon	Circle	Hexagram	Triangle	Square	Hexagon	Circle	Hexagram	Triangle	Square	Hexagon	Circle	Hexagram
Baoding	1.77216	1.75674	1.7481	1.74216	1.78868	1.78021	1.76486	1.75626	1.75034	1.79665	1.78107	1.76576	1.75718	1.75128	1.79748
Beijing	1.8189	1.80665	1.79981	1.79511	1.83209	1.81364	1.80184	1.79525	1.79073	1.82635	1.80966	1.79809	1.79164	1.78721	1.82213
Cangzhou	1.78494	1.76831	1.75897	1.75254	1.80272	1.78295	1.76664	1.75748	1.75118	1.8004	1.78597	1.76957	1.76037	1.75404	1.8035
Chengde	1.77061	1.75377	1.74431	1.7378	1.78862	1.76901	1.75214	1.74267	1.73616	1.78703	1.77206	1.75527	1.74584	1.73936	1.79
Handan	1.79223	1.77667	1.76794	1.76194	1.80889	1.78335	1.76797	1.75935	1.75343	1.79982	1.78335	1.76797	1.75935	1.75343	1.79982
Hengshui	1.79704	1.78008	1.77055	1.76398	1.81516	1.81722	1.79997	1.79027	1.78359	1.83563	1.81518	1.79862	1.78931	1.7829	1.83288
Langfang	1.80287	1.7861	1.77667	1.77019	1.82079	1.80418	1.78748	1.7781	1.77164	1.82202	1.8076	1.79093	1.78156	1.77511	1.82542
Qinhuangdao	1.78492	1.76878	1.75972	1.75349	1.80219	1.79738	1.78171	1.77291	1.76687	1.81416	1.81137	1.79577	1.78702	1.781	1.82807
Shijiazhuang	1.80843	1.79399	1.7859	1.78034	1.82392	1.80503	1.79088	1.78296	1.77751	1.82021	1.80728	1.79333	1.78552	1.78016	1.82225
Tangshan	1.77925	1.76426	1.75586	1.75008	1.79532	1.77997	1.76506	1.75671	1.75098	1.79594	1.78616	1.77149	1.76327	1.75763	1.80189
Tianjin	1.7873	1.77439	1.76718	1.76223	1.80118	1.80073	1.78853	1.78173	1.77706	1.81385	1.81042	1.79846	1.79178	1.7872	1.8233
Xingtai	1.79237	1.77625	1.7672	1.76098	1.80961	1.79568	1.77957	1.77054	1.76432	1.8129	1.79879	1.78274	1.77373	1.76753	1.81597
Zhuangjiakou	1.80591	1.7877	1.77745	1.77039	1.82531	1.80546	1.78734	1.77714	1.77011	1.82478	1.81183	1.79486	1.78532	1.77876	1.82995
Avearage	1.79207	1.77644	1.76766	1.76163	1.80881	1.79498	1.77954	1.77087	1.76492	1.81152	1.79852	1.7833	1.77476	1.76889	1.81482
