# Supplementary material for: Two Sets of Simple Formulae to Estimating Fractal Dimension of Irregular Boundaries
Source: Hindawi journal article supplement (doi:10.1155/2020/7528703), 2020-02-26
Supplement: f1 [file 7528703.f1.zip › File 2_Datasets for the fractal indexes based on urban area-perimeter relations of Yangtze River Delta 2019-09-14.xlsx]

## Sheet: 1985
City	Measure in 1985		Fractal dimension 1					Fractal dimension 2					Shape index					Adjusted boundary dimension					Form dimension
	Perimeter P	Urban area A	Triangle	Square	Hexagon	Circle	Hexagram	Triangle	Square	Hexagon	Circle	Hexagram	Triangle	Square	Hexagon	Circle	Hexagram	Triangle	Square	Hexagon	Circle	Hexagram	Triangle	Square	Hexagon	Circle	Hexagram
Shanghai	383.3	492.52	1.37858	1.47189	1.58522	1.62655	1.52206	1.28849	1.32607	1.34767	1.36276	1.24956	0.0696768	0.0536372	0.0464512	0.0421266	0.0929024	1.14425	1.16303	1.17384	1.18138	1.12478	1.87394	1.85982	1.85191	1.84647	1.88906
Qingpu	33.56	5.23	1.93845	2.57136	4.92132	6.57453	316.788	1.49866	1.58723	1.64053	1.67884	1.41203	0.0965161	0.0742981	0.0643441	0.0583536	0.128688	1.24933	1.29362	1.32027	1.33942	1.20601	1.80043	1.77303	1.75742	1.74659	1.82918
Chongming	24.51	4.89	1.73293	2.28427	4.45058	6.15286	-23.5212	1.38446	1.46754	1.51761	1.55362	1.30333	0.169186	0.130239	0.112791	0.10229	0.225581	1.19223	1.23377	1.25881	1.27681	1.15167	1.83876	1.81052	1.7944	1.7832	1.86831
Songjiang	49.74	12.88	1.65545	1.97248	2.64232	2.93269	3.13278	1.39781	1.46645	1.50713	1.53609	1.3294	0.108205	0.083296	0.0721365	0.0654205	0.144273	1.19891	1.23322	1.25357	1.26804	1.1647	1.83409	1.81088	1.79772	1.78862	1.85859
Jinshan	20.53	4.43	1.65415	2.19779	4.61043	6.8904	-6.7325	1.33635	1.4184	1.46795	1.50364	1.25643	0.218458	0.168169	0.145639	0.13208	0.291277	1.16817	1.2092	1.23398	1.25182	1.12821	1.85604	1.82699	1.81039	1.79884	1.88636
Nanjing	286.55	113.24	1.63812	1.80637	2.04844	2.13125	2.05933	1.45753	1.50835	1.53784	1.55854	1.40545	0.0286643	0.0220658	0.0191095	0.0173304	0.038219	1.22876	1.25418	1.26892	1.27927	1.20272	1.81383	1.79734	1.78807	1.7817	1.83145
Jiangning	28.23	7.72	1.55635	1.9122	2.84401	3.34231	4.32173	1.31562	1.38709	1.42979	1.46033	1.24509	0.201343	0.154994	0.134229	0.121732	0.268458	1.15781	1.19354	1.21489	1.23016	1.12254	1.8637	1.83784	1.82312	1.8129	1.89083
Jiangpu	26.97	3.7	2.04735	2.91735	8.50186	17.8096	-4.76945	1.51742	1.6147	1.67369	1.71629	1.42314	0.105726	0.0813879	0.070484	0.0639219	0.140968	1.25871	1.30735	1.33684	1.35815	1.21157	1.79447	1.76491	1.74803	1.7363	1.82538
Liuhe	22.44	4.67	1.69227	2.23799	4.49902	6.42217	-11.7262	1.35982	1.44229	1.49205	1.52785	1.27938	0.192758	0.148385	0.128506	0.116542	0.257011	1.17991	1.22115	1.24602	1.26393	1.13969	1.84752	1.8189	1.80255	1.79119	1.87743
Lishui	43.18	9.46	1.72939	2.1175	3.05442	3.4971	4.27426	1.42593	1.50025	1.54451	1.5761	1.35227	0.105455	0.0811794	0.0703034	0.0637582	0.140607	1.21297	1.25013	1.27226	1.28805	1.17614	1.82443	1.79992	1.78601	1.77637	1.85024
Gaochun	19.26	4.47	1.59307	2.0993	4.29869	6.35262	-6.2861	1.30551	1.3855	1.4338	1.46858	1.22758	0.250459	0.192804	0.166973	0.151428	0.333945	1.15276	1.19275	1.2169	1.23429	1.11379	1.86749	1.8384	1.82176	1.81018	1.89783
Wuxi	152.58	60.54	1.59063	1.77486	2.05552	2.15632	2.07119	1.40881	1.46241	1.49366	1.51566	1.35422	0.0540492	0.0416071	0.0360328	0.0326781	0.0720656	1.2044	1.23121	1.24683	1.25783	1.17711	1.83029	1.81221	1.80203	1.79502	1.84954
Jiangyin	46.77	15.51	1.53508	1.79388	2.29861	2.51431	2.48789	1.33152	1.3947	1.43206	1.4586	1.26835	0.147373	0.113448	0.0982489	0.0891019	0.196498	1.16576	1.19735	1.21603	1.2293	1.13417	1.85781	1.83518	1.82235	1.81347	1.8817
Yixing	29.33	5.13	1.84459	2.43693	4.66492	6.28389	-139.502	1.44715	1.53305	1.58477	1.62194	1.36317	0.123947	0.0954142	0.0826312	0.0749382	0.165262	1.22358	1.26653	1.29238	1.31097	1.18158	1.81728	1.78956	1.77376	1.76279	1.84632
Changzhou	156.09	64.98	1.57724	1.75566	2.02446	2.12095	2.03117	1.40128	1.45406	1.4848	1.50644	1.34751	0.0554334	0.0426726	0.0369556	0.033515	0.0739112	1.20064	1.22703	1.2424	1.25322	1.17375	1.83289	1.81498	1.80489	1.79794	1.85197
Liyang	22.46	3.79	1.85597	2.59004	6.9915	13.578	-3.9729	1.42525	1.51609	1.57114	1.61088	1.33716	0.156157	0.12021	0.104105	0.0944125	0.208209	1.21263	1.25804	1.28557	1.30544	1.16858	1.82466	1.79488	1.77786	1.76602	1.85574
Jintan	25.72	4.69	1.80376	2.40835	4.92841	7.0346	-14.8774	1.41813	1.50405	1.55588	1.59318	1.33431	0.147358	0.113436	0.0982385	0.0890924	0.196477	1.20907	1.25203	1.27794	1.29659	1.16716	1.82708	1.7987	1.78251	1.77125	1.85678
Suzhou	137.89	54.19	1.5852	1.77341	2.06384	2.16912	2.08272	1.40221	1.45644	1.48808	1.51037	1.34706	0.0592373	0.0456009	0.0394916	0.0358149	0.0789831	1.2011	1.22822	1.24404	1.25518	1.17353	1.83257	1.81419	1.80383	1.7967	1.85213
Changshu	67.02	11.92	1.87402	2.27478	3.16812	3.55026	4.14329	1.52564	1.60166	1.64677	1.67889	1.44997	0.0551581	0.0424607	0.0367721	0.0333486	0.0735441	1.26282	1.30083	1.32338	1.33945	1.22498	1.79188	1.76874	1.75564	1.74658	1.81634
Zhangjiagang	37.78	6.7	1.84964	2.36105	3.88462	4.73714	9.02378	1.47145	1.5538	1.60313	1.63847	1.39042	0.0975647	0.0751054	0.0650431	0.0589876	0.130086	1.23573	1.2769	1.30157	1.31924	1.19521	1.80924	1.78315	1.76831	1.75801	1.83667
Kunshan	45.19	8.85	1.79775	2.22396	3.29478	3.81003	4.98018	1.46161	1.53881	1.58484	1.61771	1.38519	0.0900742	0.0693392	0.0600495	0.0544588	0.120099	1.2308	1.26941	1.29242	1.30886	1.1926	1.81248	1.78777	1.77374	1.76403	1.83851
Wujiang	28.46	6.47	1.66402	2.10179	3.41239	4.18197	7.87742	1.36635	1.44339	1.48957	1.52267	1.2906	0.166026	0.127807	0.110684	0.100379	0.221368	1.18317	1.2217	1.24479	1.26133	1.1453	1.84518	1.81853	1.80335	1.79281	1.87313
Taicang	35.55	7.57	1.72819	2.15854	3.32737	3.94118	5.77256	1.41188	1.48889	1.53492	1.56785	1.33591	0.124497	0.0958378	0.0829979	0.0752708	0.165996	1.20594	1.24444	1.26746	1.28392	1.16795	1.82923	1.80357	1.78898	1.77886	1.8562
Nantong	53.85	27.94	1.38592	1.56148	1.84773	1.96613	1.78498	1.25268	1.30638	1.33792	1.36023	1.19851	0.200261	0.154161	0.133507	0.121078	0.267015	1.12634	1.15319	1.16896	1.18011	1.09925	1.88783	1.86716	1.85546	1.84738	1.90971
Hai'an	36.2	10.7	1.55302	1.85868	2.5395	2.85787	3.05722	1.32819	1.39575	1.43591	1.46454	1.26106	0.16971	0.130643	0.11314	0.102607	0.226281	1.16409	1.19788	1.21796	1.23227	1.13053	1.85904	1.83481	1.82105	1.81151	1.88454
Rudong	16.44	4.09	1.5151	2.00693	4.44256	7.29178	-2.63029	1.26035	1.33921	1.38693	1.42133	1.1837	0.31453	0.242125	0.209686	0.190165	0.419373	1.13018	1.16961	1.19346	1.21067	1.09185	1.88482	1.85499	1.8379	1.82599	1.91588
Haimen	19.05	5.81	1.42377	1.77403	2.87101	3.608	8.27784	1.22953	1.30051	1.34314	1.37373	1.15993	0.332758	0.256157	0.221838	0.201185	0.443677	1.11477	1.15026	1.17157	1.18687	1.07996	1.89705	1.86937	1.85356	1.84256	1.92596
Qidong	19.33	6.35	1.38751	1.70452	2.61815	3.19381	4.75476	1.21313	1.28181	1.323	1.35252	1.14563	0.353225	0.271913	0.235484	0.21356	0.470967	1.10657	1.14091	1.1615	1.17626	1.07282	1.9037	1.8765	1.86096	1.85015	1.93213
Rugao	29.75	5.74	1.7754	2.29652	4.0396	5.1597	18.2422	1.4191	1.50124	1.55058	1.586	1.33856	0.134797	0.103767	0.0898646	0.0814982	0.179729	1.20955	1.25062	1.27529	1.293	1.16928	1.82675	1.7996	1.78414	1.7734	1.85523
Yangzhou	112.91	38.53	1.61659	1.82958	2.17664	2.30479	2.23775	1.41395	1.47154	1.50524	1.52903	1.35562	0.0628168	0.0483564	0.0418779	0.037979	0.0837558	1.20698	1.23577	1.25262	1.26452	1.17781	1.82852	1.80921	1.79833	1.79082	1.84903
Jiangdu	29.05	7.6	1.58485	1.95521	2.93887	3.4664	4.65041	1.33101	1.40354	1.44689	1.47791	1.25944	0.187182	0.144092	0.124788	0.11317	0.249575	1.1655	1.20177	1.22345	1.23895	1.12972	1.858	1.83211	1.81736	1.80713	1.88518
Yizheng	47.51	8.73	1.83925	2.28418	3.41451	3.95889	5.3042	1.4847	1.56334	1.61023	1.64373	1.40688	0.080387	0.061882	0.0535914	0.048602	0.107183	1.24235	1.28167	1.30512	1.32186	1.20344	1.80493	1.78023	1.76622	1.75651	1.83095
Taizhou	58.73	17.8	1.60075	1.86625	2.37077	2.57724	2.5795	1.37753	1.4413	1.47894	1.50565	1.31362	0.107261	0.0825696	0.0715073	0.06485	0.143015	1.18876	1.22065	1.23947	1.25282	1.15681	1.84121	1.81924	1.8068	1.7982	1.86444
Jiangyan (Tai)	28.73	6.48	1.67005	2.11016	3.42729	4.19913	7.90785	1.36977	1.44698	1.49326	1.52643	1.29385	0.163172	0.12561	0.108781	0.0986538	0.217563	1.18488	1.22349	1.24663	1.26321	1.14693	1.84396	1.81733	1.80216	1.79163	1.8719
Taixing	38.95	9.45	1.6631	2.02669	2.89724	3.31322	3.93707	1.38717	1.45948	1.50255	1.53328	1.3155	0.129467	0.0996637	0.0863113	0.0782757	0.172623	1.19358	1.22974	1.25127	1.26664	1.15775	1.83781	1.81318	1.79919	1.78949	1.86375
Jingjiang	49.63	11.07	1.73143	2.09488	2.91533	3.28178	3.7542	1.43592	1.50849	1.5516	1.58233	1.36378	0.0934116	0.0719083	0.0622744	0.0564767	0.124549	1.21796	1.25424	1.2758	1.29116	1.18189	1.82104	1.79729	1.78382	1.7745	1.8461
Zhenjiang	109.18	29.67	1.70063	1.95078	2.38259	2.54308	2.5348	1.461	1.52303	1.55942	1.58516	1.39838	0.0517337	0.0398246	0.0344891	0.0312782	0.0689782	1.2305	1.26151	1.27971	1.29258	1.19919	1.81268	1.7927	1.78143	1.77365	1.83389
Jurong	25.73	3.54	2.04562	2.9449	9.41246	23.615	-3.97482	1.51112	1.60906	1.66851	1.71148	1.41633	0.111139	0.0855547	0.0740925	0.0671945	0.148185	1.25556	1.30453	1.33426	1.35574	1.20816	1.79646	1.76656	1.74948	1.73761	1.8277
Yangzhong	19.13	3.65	1.73817	2.41744	6.82146	14.8453	-2.64079	1.3635	1.45121	1.50441	1.54284	1.27854	0.207303	0.159582	0.138202	0.125335	0.276403	1.18175	1.2256	1.25221	1.27142	1.13927	1.8462	1.81592	1.79859	1.78652	1.87776
Danyang	38.86	7.33	1.81081	2.28283	3.60239	4.3012	6.8306	1.45636	1.53633	1.58415	1.61838	1.37751	0.100888	0.0776638	0.0672588	0.060997	0.134518	1.22818	1.26816	1.29208	1.30919	1.18876	1.81421	1.78854	1.77395	1.76383	1.84121
Hangzhou	160.88	67.49	1.57737	1.75422	2.01946	2.11446	2.02472	1.4023	1.45482	1.48541	1.50694	1.34875	0.0541972	0.0417211	0.0361315	0.0327676	0.072263	1.20115	1.22741	1.24271	1.25347	1.17438	1.83254	1.81472	1.80469	1.79778	1.85152
Tonglu	12.56	1.98	1.88398	3.3501	-5.43855	-3.00083	-0.094547	1.36148	1.46455	1.52816	1.57462	1.26368	0.260872	0.20082	0.173915	0.157723	0.34783	1.18074	1.23228	1.26408	1.28731	1.13184	1.84693	1.81151	1.79109	1.77681	1.88352
Fuyang	15.79	2.94	1.73412	2.5465	15.6524	-27.7894	-0.963884	1.34191	1.43307	1.48868	1.52898	1.25418	0.24509	0.18867	0.163393	0.148181	0.326786	1.17095	1.21654	1.24434	1.26449	1.12709	1.85401	1.82201	1.80364	1.79083	1.88724
Lin'an	25.85	3.86	1.96896	2.7631	7.37846	13.7365	-5.16334	1.48342	1.57754	1.63457	1.67572	1.39209	0.120063	0.0924243	0.0800418	0.0725899	0.160084	1.24171	1.28877	1.31728	1.33786	1.19604	1.80534	1.77593	1.75914	1.74746	1.83609
Yuhang	10.33	1.47	2.02322	4.92526	-1.90793	-1.30927	0.237364	1.36574	1.47889	1.54947	1.60139	1.25975	0.286325	0.220413	0.190883	0.173112	0.381766	1.18287	1.23944	1.27473	1.30069	1.12988	1.8454	1.80681	1.78448	1.76882	1.88505
Xiaoshan	21.17	4.99	1.59872	2.07323	3.86362	5.25045	-28.0456	1.3153	1.39387	1.4412	1.47523	1.23854	0.23142	0.178147	0.15428	0.139916	0.30856	1.15765	1.19693	1.2206	1.23761	1.11927	1.86382	1.83547	1.81927	1.80801	1.89344
Ningbo	82.98	29.93	1.56757	1.78431	2.14954	2.28977	2.20874	1.37371	1.43195	1.46612	1.49028	1.31491	0.0903445	0.0695472	0.0602297	0.0546223	0.120459	1.18686	1.21597	1.23306	1.24514	1.15746	1.84256	1.82239	1.81099	1.80312	1.86396
Xiangshan	21.26	3.62	1.84436	2.59707	7.62772	17.1993	-3.16464	1.41497	1.50617	1.56151	1.60148	1.32664	0.166465	0.128145	0.110977	0.100645	0.221954	1.20749	1.25309	1.28075	1.30074	1.16332	1.82817	1.79803	1.78079	1.76879	1.85961
Ninghai	20.31	5.61	1.49324	1.88434	3.16806	4.04689	13.7333	1.2655	1.33912	1.38337	1.41514	1.19336	0.282673	0.217602	0.188449	0.170904	0.376898	1.13275	1.16956	1.19169	1.20757	1.09668	1.88281	1.85502	1.83915	1.82811	1.91184
Yuyao	64.56	14.4	1.75159	2.08554	2.77477	3.06039	3.30162	1.46194	1.53226	1.57387	1.60346	1.39172	0.0718087	0.0552784	0.0478725	0.0434156	0.095745	1.23097	1.26613	1.28694	1.30173	1.19586	1.81237	1.78981	1.77704	1.76821	1.83622
Cixi	24.09	4.67	1.75194	2.33007	4.74102	6.78013	-13.0553	1.39084	1.47519	1.52608	1.5627	1.30856	0.167257	0.128755	0.111505	0.101124	0.22301	1.19542	1.23759	1.26304	1.28135	1.15428	1.83653	1.80802	1.79174	1.78043	1.86634
Fenghua	18.32	3.29	1.78451	2.55557	9.45495	46.3679	-1.85146	1.37653	1.4674	1.52266	1.56263	1.28878	0.203745	0.156843	0.13583	0.123184	0.27166	1.18827	1.2337	1.26133	1.28132	1.14439	1.84156	1.81057	1.79282	1.78045	1.87383
Jiaxing	46.17	11.71	1.65809	1.98829	2.71051	3.03174	3.31663	1.39493	1.46467	1.50607	1.53555	1.32553	0.114177	0.0878936	0.0761181	0.0690315	0.152236	1.19747	1.23233	1.25303	1.26778	1.16276	1.8351	1.81147	1.79806	1.78878	1.86002
Jiashan	22.66	4.31	1.75984	2.37424	5.25061	8.11317	-6.79958	1.38843	1.47423	1.52608	1.56344	1.30492	0.174461	0.1343	0.116308	0.105479	0.232615	1.19422	1.23712	1.26304	1.28172	1.15246	1.83737	1.80833	1.79174	1.7802	1.86771
Haiyan	22.85	3.97	1.83264	2.52785	6.30758	11.0331	-4.78572	1.41807	1.50744	1.56154	1.60057	1.33128	0.158037	0.121657	0.105358	0.0955494	0.210717	1.20903	1.25372	1.28077	1.30029	1.16564	1.82711	1.79763	1.78078	1.76906	1.8579
Haining	22.75	5.64	1.57854	2.0097	3.439	4.39777	15.608	1.31171	1.38793	1.43374	1.46662	1.23702	0.226495	0.174356	0.150997	0.136939	0.301993	1.15586	1.19397	1.21687	1.23331	1.11851	1.86516	1.83754	1.82178	1.81083	1.89405
Pinghu	15.19	3.04	1.6646	2.4002	11.8263	-53.7083	-0.879492	1.31239	1.40079	1.45465	1.49367	1.22724	0.273842	0.210804	0.182561	0.165565	0.365123	1.1562	1.20039	1.22733	1.24684	1.11362	1.8649	1.83306	1.81478	1.80203	1.89797
Tongxiang	18.35	3.29	1.78612	2.55832	9.46881	46.4388	-1.85862	1.37731	1.46822	1.52351	1.56351	1.28951	0.203079	0.156331	0.135386	0.122782	0.270772	1.18865	1.23411	1.26176	1.28176	1.14475	1.84129	1.8103	1.79255	1.78018	1.87355
Huzhou	28.61	10.43	1.41758	1.67823	2.24761	2.52656	2.49394	1.247	1.31076	1.34867	1.3757	1.1837	0.264844	0.203877	0.176563	0.160125	0.353126	1.1235	1.15538	1.17433	1.18785	1.09185	1.89007	1.86552	1.85155	1.84186	1.91588
Deqing	5.77	1.49	1.05855	1.83751	0.140603	0.228446	1.17238	1.02108	1.10531	1.15783	1.19644	0.942127	0.9302	0.716069	0.620134	0.562399	1.24027	1.01054	1.05266	1.07891	1.09822	0.971063	1.98957	1.94998	1.92686	1.91056	2.0298
Changxing	30.88	6.81	1.69232	2.13076	3.4004	4.11609	6.98923	1.38517	1.46243	1.50869	1.54182	1.30913	0.148434	0.114265	0.0989562	0.0897434	0.197912	1.19259	1.23121	1.25434	1.27091	1.15457	1.83851	1.81221	1.79723	1.78684	1.86613
Anji	13.21	2.14	1.85551	3.14056	-8.13768	-3.87106	-0.216585	1.36019	1.4609	1.5229	1.56811	1.26435	0.254888	0.196213	0.169926	0.154105	0.339851	1.1801	1.23045	1.26145	1.28405	1.13217	1.84739	1.81271	1.79274	1.77878	1.88326
Shaoxing	49	20.21	1.4536	1.66692	2.04744	2.20682	2.07164	1.2886	1.34694	1.38132	1.4057	1.23002	0.174951	0.134677	0.116634	0.105775	0.233268	1.1443	1.17347	1.19066	1.20285	1.11501	1.8739	1.85217	1.83987	1.83136	1.89685
Chengxian	16.11	3.38	1.63595	2.28783	7.5079	25.7448	-1.36979	1.30733	1.39304	1.44513	1.4828	1.22448	0.270687	0.208375	0.180458	0.163657	0.360916	1.15366	1.19652	1.22257	1.2414	1.11224	1.8668	1.83576	1.81795	1.80554	1.89908
Xinchang	24.32	5.87	1.60553	2.03972	3.4341	4.33009	11.5863	1.32858	1.4051	1.45105	1.48402	1.25352	0.206278	0.158793	0.137519	0.124716	0.275037	1.16429	1.20255	1.22553	1.24201	1.12676	1.85889	1.83157	1.81598	1.80515	1.8875
Zhuji	24.14	3.57	1.97697	2.82512	8.76108	21.0582	-3.7243	1.47854	1.57417	1.6322	1.67414	1.38596	0.127331	0.0980198	0.0848876	0.0769845	0.169775	1.23927	1.28708	1.3161	1.33707	1.19298	1.80693	1.77695	1.75982	1.7479	1.83824
Shangyu	13.67	1.68	2.23722	4.73756	-3.77746	-2.48373	-0.230793	1.47211	1.58912	1.66174	1.71499	1.36184	0.186859	0.143844	0.124573	0.112975	0.249145	1.23605	1.29456	1.33087	1.35749	1.18092	1.80903	1.77246	1.75139	1.73665	1.8468
Zhoushan	46.57	7.28	1.94346	2.47305	3.97763	4.76696	8.0427	1.53046	1.61462	1.66496	1.70099	1.4475	0.0697687	0.053708	0.0465125	0.0421822	0.093025	1.26523	1.30731	1.33248	1.35049	1.22375	1.79037	1.76493	1.75048	1.74047	1.81716
Avearage	49.0366	19.9574	1.69853	2.25782	3.77025	5.27895	3.3584	1.37984	1.45751	1.50421	1.53774	1.30373	0.170411	0.131183	0.113607	0.103031	0.227215	1.18992	1.22876	1.2521	1.26887	1.15186	1.84153	1.81497	1.79981	1.78929	1.86935

## Sheet: 1996
City	Measure in 1996		Fractal dimension 1					Fractal dimension 2					Shape index					Adjusted boundary dimension					Form dimension
	Perimeter P	Urban area A	Triangle	Square	Hexagon	Circle	Hexagram	Triangle	Square	Hexagon	Circle	Hexagram	Triangle	Square	Hexagon	Circle	Hexagram	Triangle	Square	Hexagon	Circle	Hexagram	Triangle	Square	Hexagon	Circle	Hexagram
Shanghai	629.58	657.73	1.45962	1.55923	1.6817	1.72422	1.63613	1.35358	1.39181	1.41377	1.42909	1.31388	0.0344896	0.0265501	0.022993	0.0208524	0.0459861	1.17679	1.19591	1.20688	1.21454	1.15694	1.84977	1.83619	1.82858	1.82335	1.86435
Qingpu	29.78	9.36	1.49359	1.7953	2.49998	2.85049	3.08883	1.28782	1.35509	1.39515	1.42375	1.22117	0.219366	0.168868	0.146244	0.132628	0.292487	1.14391	1.17754	1.19758	1.21187	1.11058	1.87419	1.84923	1.83502	1.82517	1.90043
Chongming	22.85	6.29	1.51747	1.89526	3.02467	3.71944	6.74242	1.28415	1.35701	1.4007	1.43202	1.21257	0.250392	0.192752	0.166928	0.151387	0.333856	1.14208	1.1785	1.20035	1.21601	1.10629	1.8756	1.84853	1.83309	1.82236	1.90393
Songjiang	26.74	15.46	1.22372	1.38765	1.67582	1.81771	1.46974	1.13856	1.19262	1.22458	1.24729	1.08451	0.449395	0.345945	0.299597	0.271704	0.599194	1.06928	1.09631	1.11229	1.12365	1.04226	1.93521	1.91215	1.89905	1.88996	1.95946
Jinshan	21.83	5.72	1.53794	1.94613	3.27301	4.15663	12.4597	1.29057	1.36533	1.41024	1.44247	1.21728	0.249477	0.192047	0.166318	0.150834	0.332636	1.14528	1.18266	1.20512	1.22124	1.10864	1.87315	1.84555	1.82979	1.81884	1.90201
Nanjing	257.13	171.48	1.48826	1.61855	1.79384	1.85597	1.75297	1.35709	1.40193	1.42787	1.44605	1.31097	0.0539076	0.0414981	0.0359384	0.0325925	0.0718768	1.17854	1.20097	1.21394	1.22303	1.15549	1.84851	1.83266	1.82377	1.81764	1.86544
Jiangning	57.84	17.62	1.5969	1.86222	2.36741	2.57472	2.57596	1.37473	1.43848	1.47612	1.50283	1.31085	0.109469	0.0842693	0.0729793	0.0661849	0.145959	1.18736	1.21924	1.23806	1.25141	1.15542	1.8422	1.82018	1.80772	1.7991	1.86548
Jiangpu	49.04	8.29	1.89295	2.37001	3.62133	4.23522	6.02712	1.51192	1.59285	1.64115	1.67567	1.43192	0.0716466	0.0551536	0.0477644	0.0433175	0.0955288	1.25596	1.29642	1.32057	1.33783	1.21596	1.7962	1.77135	1.75725	1.74748	1.8224
Liuhe	26.16	7.95	1.48832	1.81166	2.63317	3.07258	3.66523	1.27824	1.34725	1.38847	1.41794	1.21008	0.241454	0.185871	0.160969	0.145983	0.321938	1.13912	1.17363	1.19423	1.20897	1.10504	1.87787	1.85206	1.83736	1.82715	1.90494
Lishui	37.82	9.46	1.64343	1.99953	2.8493	3.25663	3.83184	1.37574	1.44744	1.49014	1.52062	1.30467	0.137464	0.10582	0.0916429	0.0831109	0.183286	1.18787	1.22372	1.24507	1.26031	1.15234	1.84184	1.81718	1.80317	1.79346	1.8678
Gaochun	19.26	4.47	1.59307	2.0993	4.29869	6.35262	-6.2861	1.30551	1.3855	1.4338	1.46858	1.22758	0.250459	0.192804	0.166973	0.151428	0.333945	1.15276	1.19275	1.2169	1.23429	1.11379	1.86749	1.8384	1.82176	1.81018	1.89783
Wuxi	137.39	98.23	1.41003	1.54187	1.7239	1.79223	1.65879	1.29182	1.33774	1.36441	1.38314	1.24483	0.108162	0.0832633	0.0721082	0.0653949	0.144216	1.14591	1.16887	1.1822	1.19157	1.12242	1.87267	1.85553	1.84588	1.83923	1.89093
Jiangyin	69.01	25.75	1.53504	1.75343	2.12977	2.27824	2.18598	1.34792	1.40649	1.44091	1.46528	1.2889	0.112382	0.0865114	0.074921	0.0679459	0.149842	1.17396	1.20324	1.22046	1.23264	1.14445	1.85182	1.83109	1.81937	1.81127	1.87378
Yixing	37.58	11.37	1.54705	1.84303	2.48571	2.7811	2.91565	1.32712	1.39384	1.43347	1.4617	1.26075	0.167336	0.128815	0.111557	0.101171	0.223114	1.16356	1.19692	1.21673	1.23085	1.13038	1.85943	1.83548	1.82187	1.81245	1.88466
Changzhou	207.79	114	1.52082	1.6681	1.87483	1.94831	1.84674	1.37355	1.42141	1.44917	1.46866	1.32451	0.0548779	0.042245	0.0365853	0.0331792	0.0731705	1.18678	1.2107	1.22458	1.23433	1.16226	1.84262	1.82597	1.8166	1.81016	1.86039
Liyang	56.49	12.71	1.73727	2.0829	2.82474	3.14266	3.46385	1.44678	1.518	1.56022	1.59028	1.37581	0.0827836	0.0637268	0.0551891	0.0500509	0.110378	1.22339	1.259	1.28011	1.29514	1.1879	1.8174	1.79428	1.78118	1.77212	1.84182
Jintan	41.98	10.91	1.63548	1.96754	2.71158	3.05123	3.37652	1.37805	1.44789	1.48939	1.51897	1.30864	0.128671	0.0990512	0.0857809	0.0777947	0.171562	1.18902	1.22394	1.24469	1.25948	1.15432	1.84103	1.81703	1.80341	1.79398	1.86631
Suzhou	166.28	104.3	1.46421	1.60411	1.79928	1.87053	1.75289	1.33143	1.37837	1.40562	1.42476	1.28336	0.0784054	0.0603565	0.0522703	0.0474039	0.104541	1.16571	1.18919	1.20281	1.21238	1.14168	1.85784	1.84091	1.83139	1.82482	1.8759
Changshu	66.09	25.26	1.52103	1.73709	2.10975	2.25776	2.15785	1.33825	1.39658	1.43088	1.45515	1.27948	0.1202	0.0925298	0.0801332	0.0726728	0.160266	1.16912	1.19829	1.21544	1.22758	1.13974	1.85534	1.83452	1.82275	1.81461	1.87739
Zhangjiagang	47.52	18.42	1.47319	1.69893	2.11306	2.28786	2.17499	1.29838	1.35812	1.39337	1.41838	1.23847	0.169543	0.130514	0.113028	0.102505	0.226057	1.14919	1.17906	1.19668	1.20919	1.11924	1.87018	1.84813	1.83564	1.827	1.89347
Kunshan	39.67	18.92	1.36714	1.56063	1.90268	2.05261	1.85048	1.23212	1.28854	1.32182	1.34543	1.17551	0.249884	0.192361	0.166589	0.15108	0.333179	1.11606	1.14427	1.16091	1.17272	1.08776	1.89601	1.87392	1.86139	1.85272	1.91932
Wujiang	21.45	7.92	1.35365	1.62312	2.28592	2.65578	2.75614	1.2014	1.26631	1.30508	1.3328	1.13729	0.357777	0.275417	0.238518	0.216312	0.477036	1.1007	1.13316	1.15254	1.1664	1.06864	1.90851	1.88249	1.86765	1.85734	1.93576
Taicang	29.53	11.29	1.40255	1.64949	2.16949	2.41955	2.32088	1.2405	1.30295	1.34005	1.36648	1.17839	0.269097	0.207151	0.179398	0.162696	0.358796	1.12025	1.15148	1.17002	1.18324	1.0892	1.89266	1.86845	1.85468	1.84514	1.91811
Nantong	109.35	46.99	1.53446	1.71861	2.00527	2.11199	2.00693	1.36387	1.41775	1.44923	1.47143	1.30916	0.0816789	0.0628764	0.0544526	0.049383	0.108905	1.18194	1.20888	1.22462	1.23571	1.15458	1.84607	1.82721	1.81658	1.80925	1.86611
Hai'an	32.86	12.99	1.40754	1.6426	2.11319	2.33101	2.19883	1.24759	1.30875	1.345	1.3708	1.18662	0.250044	0.192484	0.166696	0.151176	0.333392	1.1238	1.15438	1.1725	1.1854	1.09331	1.88984	1.86627	1.85288	1.8436	1.91466
Rudong	19.32	7.06	1.33446	1.61155	2.33953	2.77447	3.10729	1.18715	1.25285	1.29217	1.32033	1.12242	0.393127	0.302629	0.262084	0.237684	0.524169	1.09357	1.12643	1.14609	1.16016	1.06121	1.91443	1.88776	1.87253	1.86195	1.94232
Haimen	25.01	7.55	1.48374	1.81344	2.67632	3.15094	3.93101	1.27351	1.34301	1.38455	1.41427	1.20494	0.250877	0.193125	0.167252	0.15168	0.334503	1.13675	1.1715	1.19227	1.20713	1.10247	1.8797	1.8536	1.83873	1.82841	1.90705
Qidong	23.42	8.57	1.37675	1.64532	2.28209	2.62215	2.67287	1.21702	1.28172	1.32032	1.34789	1.15302	0.32475	0.249993	0.2165	0.196344	0.433	1.10851	1.14086	1.16016	1.17395	1.07651	1.90211	1.87653	1.86195	1.85183	1.92893
Rugao	60.47	15.42	1.6814	1.98552	2.59464	2.84646	2.97356	1.42192	1.48945	1.52939	1.55777	1.35439	0.0876489	0.0674721	0.0584326	0.0529925	0.116865	1.21096	1.24473	1.2647	1.27889	1.17719	1.82579	1.80339	1.7907	1.78193	1.84948
Yangzhou	154.97	44.59	1.70229	1.92597	2.28756	2.4166	2.38029	1.47642	1.53521	1.56957	1.59381	1.41676	0.0385908	0.0297072	0.0257272	0.023332	0.0514544	1.23821	1.2676	1.28479	1.2969	1.20838	1.80762	1.78889	1.77834	1.77107	1.82756
Jiangdu	41.29	10.36	1.65169	1.9969	2.78902	3.15573	3.5816	1.38515	1.45606	1.49823	1.5283	1.31474	0.126302	0.0972277	0.0842017	0.0763624	0.168403	1.19257	1.22803	1.24911	1.26415	1.15737	1.83852	1.81431	1.80057	1.79105	1.86403
Yizheng	38.58	13.86	1.47382	1.72418	2.22307	2.44544	2.38068	1.28998	1.35246	1.38947	1.41578	1.22762	0.193544	0.148991	0.12903	0.117017	0.258059	1.14499	1.17623	1.19473	1.20789	1.11381	1.87337	1.85017	1.83701	1.82789	1.89782
Taizhou	64.12	21.51	1.56812	1.80834	2.24151	2.4149	2.35936	1.36357	1.42465	1.46062	1.48611	1.30219	0.108741	0.0837092	0.0724943	0.0657451	0.144989	1.18179	1.21232	1.23031	1.24305	1.15109	1.84618	1.82486	1.8128	1.80447	1.86874
Jiangyan (Tai)	38.09	8.72	1.69276	2.08131	3.05272	3.5304	4.46221	1.40003	1.4742	1.51843	1.55002	1.32663	0.124921	0.0961644	0.0832809	0.0755274	0.166562	1.20001	1.2371	1.25921	1.27501	1.16332	1.83332	1.80834	1.79415	1.78431	1.85961
Taixing	40.68	15.11	1.46783	1.70839	2.17425	2.37849	2.2874	1.28905	1.3505	1.38685	1.41268	1.22762	0.189777	0.146091	0.126518	0.114739	0.253037	1.14452	1.17525	1.19343	1.20634	1.11381	1.87373	1.85088	1.83792	1.82895	1.89782
Jingjiang	31.82	16.11	1.30598	1.49224	1.82864	1.98472	1.72368	1.19033	1.24643	1.27958	1.30312	1.13421	0.330702	0.254575	0.220468	0.199942	0.440936	1.09517	1.12321	1.13979	1.15156	1.0671	1.9131	1.8903	1.87736	1.86839	1.93712
Zhenjiang	130.62	44.83	1.62663	1.83335	2.16321	2.28311	2.21571	1.42525	1.48196	1.5151	1.53848	1.3677	0.0546124	0.0420406	0.0364083	0.0330186	0.0728165	1.21263	1.24098	1.25755	1.26924	1.18385	1.82466	1.80581	1.7952	1.78787	1.8447
Jurong	27.58	6.74	1.61635	2.02383	3.20015	3.87569	6.39794	1.34233	1.41736	1.4623	1.49449	1.2685	0.184168	0.141772	0.122778	0.111348	0.245557	1.17117	1.20868	1.23115	1.24725	1.13425	1.85385	1.82735	1.81225	1.80177	1.88164
Yangzhong	21.64	6.28	1.47769	1.83768	2.90683	3.57088	6.22467	1.26224	1.33387	1.37683	1.40763	1.19185	0.278732	0.214568	0.185821	0.168521	0.371643	1.13112	1.16694	1.18842	1.20382	1.09593	1.88408	1.85695	1.84146	1.83069	1.91247
Danyang	42.77	15.09	1.4966	1.74614	2.23284	2.44435	2.38423	1.30678	1.36909	1.40595	1.43214	1.24449	0.171456	0.131987	0.114304	0.103662	0.228608	1.15339	1.18454	1.20297	1.21607	1.12225	1.86701	1.84421	1.83127	1.82232	1.89107
Hangzhou	213.64	103.41	1.55804	1.71513	1.93952	2.01857	1.92551	1.39824	1.4476	1.47625	1.49637	1.34771	0.0470911	0.0362508	0.0313941	0.0284713	0.0627882	1.19912	1.2238	1.23813	1.24819	1.17386	1.83394	1.81713	1.80767	1.80116	1.85189
Tonglu	14.11	2.78	1.66531	2.46582	25.2698	-13.2321	-0.517939	1.30496	1.39492	1.44987	1.48974	1.21854	0.290224	0.223414	0.193482	0.175469	0.386965	1.15248	1.19746	1.22494	1.24487	1.10927	1.8677	1.8351	1.81637	1.8033	1.90149
Fuyang	34.39	7.82	1.68585	2.09217	3.16904	3.72801	5.1514	1.38984	1.46513	1.51011	1.54228	1.3155	0.137431	0.105794	0.0916206	0.0830907	0.183241	1.19492	1.23257	1.25506	1.27114	1.15775	1.83688	1.81131	1.79678	1.7867	1.86374
Lin'an	26.81	6.26	1.63985	2.07448	3.40459	4.20885	8.6316	1.35107	1.4278	1.47382	1.50681	1.27569	0.181018	0.139348	0.120679	0.109444	0.241358	1.17554	1.2139	1.23691	1.25341	1.13784	1.85068	1.82379	1.80847	1.79783	1.87885
Yuhang	24.35	6.04	1.58908	2.00871	3.32081	4.14474	9.40456	1.32124	1.39687	1.44225	1.47481	1.24701	0.211729	0.162989	0.141153	0.128011	0.282306	1.16062	1.19843	1.22113	1.2374	1.1235	1.86161	1.83442	1.81892	1.80814	1.89007
Xiaoshan	69.84	16.76	1.72189	2.02903	2.63321	2.87688	3.008	1.4509	1.51879	1.55889	1.58736	1.38293	0.071418	0.0549776	0.047612	0.0431793	0.0952239	1.22545	1.25939	1.27944	1.29368	1.19146	1.81603	1.79403	1.78159	1.77299	1.8393
Ningbo	99.57	50.54	1.47161	1.63893	1.89293	1.98916	1.8603	1.32266	1.37434	1.40452	1.42579	1.27014	0.105955	0.0815639	0.0706364	0.0640602	0.141273	1.16133	1.18717	1.20226	1.21289	1.13507	1.86108	1.84234	1.83177	1.82448	1.881
Xiangshan	11.42	2.54	1.51118	2.25083	-56.9383	-5.62169	0.138429	1.22801	1.31473	1.36783	1.40643	1.14496	0.404803	0.311617	0.269868	0.244744	0.539737	1.114	1.15736	1.18392	1.20322	1.07248	1.89766	1.86403	1.84465	1.83111	1.93242
Ninghai	22.15	7.26	1.41821	1.72676	2.54198	3.00832	3.66518	1.23504	1.30299	1.34364	1.37273	1.16805	0.307561	0.23676	0.205041	0.185951	0.410081	1.11752	1.15149	1.17182	1.18636	1.08403	1.89484	1.86844	1.85337	1.84291	1.92249
Yuyao	87.89	15.69	1.88159	2.24465	2.98548	3.28076	3.6036	1.54688	1.62012	1.66342	1.69419	1.47363	0.0422169	0.0324986	0.0281446	0.0255243	0.0562891	1.27344	1.31006	1.33171	1.34709	1.23681	1.78527	1.76332	1.75091	1.74234	1.80853
Cixi	54.75	17.69	1.56559	1.82143	2.30527	2.50528	2.47799	1.35522	1.41802	1.45509	1.48141	1.29228	0.12266	0.0944234	0.0817731	0.07416	0.163546	1.17761	1.20901	1.22755	1.2407	1.14614	1.84918	1.82712	1.81463	1.80599	1.87249
Fenghua	34.51	8.91	1.61541	1.97054	2.83915	3.26803	3.91778	1.35644	1.42799	1.47064	1.5011	1.28561	0.1555	0.119704	0.103666	0.0940151	0.207333	1.17822	1.214	1.23532	1.25055	1.1428	1.84874	1.82373	1.80951	1.79965	1.87504
Jiaxing	45.62	19.47	1.43028	1.63971	2.01438	2.17359	2.02193	1.27279	1.33079	1.36499	1.38924	1.21459	0.194445	0.149684	0.12963	0.117562	0.25926	1.1364	1.1654	1.18249	1.19462	1.10729	1.87997	1.85808	1.84567	1.83709	1.9031
Jiashan	13.57	4.72	1.26361	1.57438	2.73384	3.78297	-2.55864	1.13731	1.20612	1.24761	1.27748	1.07018	0.532751	0.410112	0.355167	0.322101	0.710335	1.06865	1.10306	1.12381	1.13874	1.03509	1.93576	1.90657	1.88983	1.87816	1.9661
Haiyan	20.09	6.09	1.43863	1.78665	2.83718	3.51205	6.493	1.23954	1.31036	1.35285	1.38333	1.17001	0.313617	0.241422	0.209078	0.189613	0.418156	1.11977	1.15518	1.17643	1.19167	1.085	1.89304	1.86567	1.85003	1.83916	1.92165
Haining	24.67	8.27	1.42864	1.7223	2.44213	2.82613	3.1016	1.24565	1.31236	1.35217	1.38063	1.17971	0.282429	0.217414	0.188286	0.170756	0.376572	1.12283	1.15618	1.17609	1.19032	1.08986	1.89061	1.86492	1.85028	1.84011	1.91755
Pinghu	21.08	6.26	1.45982	1.81229	2.85775	3.51134	6.04975	1.25229	1.32341	1.36606	1.39665	1.18242	0.292803	0.2254	0.195202	0.177028	0.390404	1.12615	1.16171	1.18303	1.19832	1.09121	1.88798	1.8608	1.84529	1.8345	1.91641
Tongxiang	20.27	5.55	1.49799	1.89386	3.20775	4.11643	15.915	1.26754	1.34145	1.38589	1.41779	1.19513	0.280755	0.216125	0.18717	0.169744	0.37434	1.13377	1.17073	1.19294	1.2089	1.09756	1.88201	1.85417	1.83826	1.8272	1.91111
Huzhou	31.84	14.19	1.35383	1.56411	1.96607	2.15259	1.94266	1.21712	1.27581	1.31056	1.33527	1.15851	0.290923	0.223953	0.193949	0.175892	0.387897	1.10856	1.13791	1.15528	1.16763	1.07926	1.90207	1.87881	1.86559	1.85643	1.92656
Deqing	9.87	3.05	1.22009	1.61989	6.20739	-30.5271	0.733541	1.10355	1.17781	1.22306	1.25584	1.032	0.65074	0.50094	0.433827	0.393437	0.867653	1.05177	1.0889	1.11153	1.12792	1.016	1.95078	1.91835	1.89966	1.88659	1.98425
Changxing	30.28	7.34	1.63365	2.03096	3.11723	3.70633	5.35916	1.35672	1.4312	1.47573	1.50761	1.28329	0.16639	0.128087	0.110926	0.100599	0.221853	1.17836	1.2156	1.23787	1.2538	1.14164	1.84864	1.82264	1.80784	1.79757	1.87593
Anji	18.39	3.53	1.72826	2.41896	7.308	18.4258	-2.20837	1.35574	1.44367	1.49706	1.53563	1.27065	0.216947	0.167006	0.144631	0.131166	0.289262	1.17787	1.22184	1.24853	1.26782	1.13532	1.84899	1.81844	1.80094	1.78876	1.88081
Shaoxing	64.55	23.08	1.54369	1.77201	2.17534	2.3363	2.25685	1.35018	1.40993	1.44509	1.47	1.29006	0.115129	0.0886264	0.0767527	0.069607	0.153505	1.17509	1.20497	1.22255	1.235	1.14503	1.851	1.8299	1.81796	1.80972	1.87334
Chengxian	22.36	7.59	1.40278	1.6982	2.45418	2.87812	3.28501	1.22792	1.29485	1.33486	1.36348	1.16187	0.31553	0.242895	0.210353	0.190769	0.420706	1.11396	1.14743	1.16743	1.18174	1.08094	1.8977	1.87152	1.85658	1.84621	1.92512
Xinchang	23.01	6.75	1.48356	1.83252	2.81569	3.39443	4.97678	1.26864	1.33953	1.38199	1.4124	1.19888	0.26498	0.203981	0.176653	0.160207	0.353306	1.13432	1.16977	1.19099	1.2062	1.09944	1.88158	1.85487	1.83964	1.82905	1.90955
Zhuji	55.66	12.82	1.72412	2.06426	2.79094	3.10236	3.39802	1.43925	1.50998	1.55191	1.58175	1.36875	0.0860089	0.0662097	0.0573393	0.052001	0.114679	1.21962	1.25499	1.27596	1.29088	1.18437	1.81992	1.79682	1.78373	1.77467	1.84433
Shangyu	42.16	7.95	1.8163	2.27205	3.48661	4.10062	5.90972	1.46512	1.54422	1.59147	1.62524	1.387	0.0929625	0.0715626	0.061975	0.0562051	0.12395	1.23256	1.27211	1.29573	1.31262	1.1935	1.81132	1.78609	1.77176	1.76183	1.83787
Zhoushan	42.44	8.68	1.76749	2.18582	3.24366	3.75919	4.92371	1.4429	1.51941	1.56504	1.59764	1.36719	0.100164	0.0771061	0.0667759	0.060559	0.133552	1.22145	1.25971	1.28252	1.29882	1.18359	1.8187	1.79384	1.77971	1.76993	1.84488
Avearage	61.4807	30.3784	1.53408	1.84701	2.11738	2.2929	3.28793	1.31927	1.3854	1.42474	1.45281	1.25363	0.197507	0.152041	0.131671	0.119413	0.263343	1.15963	1.1927	1.21237	1.22641	1.12681	1.8636	1.83962	1.82599	1.81654	1.88881

## Sheet: 2005
City	Measure in 2005		Fractal dimension 1					Fractal dimension 2					Shape index					Adjusted boundary dimension					Form dimension
	Perimeter P	Urban area A	Triangle	Square	Hexagon	Circle	Hexagram	Triangle	Square	Hexagon	Circle	Hexagram	Triangle	Square	Hexagon	Circle	Hexagram	Triangle	Square	Hexagon	Circle	Hexagram	Triangle	Square	Hexagon	Circle	Hexagram
Shanghai	1095.44	1368.11	1.46443	1.55449	1.66192	1.6987	1.61988	1.36492	1.40065	1.42111	1.43535	1.32768	0.0236966	0.0182416	0.0157977	0.0143269	0.0315954	1.18246	1.20033	1.21055	1.21767	1.16384	1.84569	1.83311	1.82607	1.82124	1.85923
Qingpu	59.29	25.93	1.45823	1.65641	1.99135	2.12687	1.98762	1.29815	1.35449	1.38761	1.41104	1.24137	0.153314	0.118021	0.102209	0.0926935	0.204419	1.14908	1.17725	1.1938	1.20552	1.12069	1.87026	1.84944	1.83766	1.82952	1.89231
Chongming	27.51	9.69	1.42592	1.69808	2.3137	2.62202	2.66263	1.24952	1.31434	1.35292	1.38045	1.18525	0.266124	0.204863	0.177416	0.160899	0.354832	1.12476	1.15717	1.17646	1.19023	1.09263	1.88908	1.86418	1.85001	1.84018	1.91523
Songjiang	83.81	71.93	1.30262	1.42305	1.58799	1.65487	1.47931	1.21166	1.25663	1.28281	1.30123	1.16578	0.212843	0.163847	0.141896	0.128685	0.283791	1.10583	1.12832	1.14141	1.15061	1.08289	1.9043	1.88628	1.87611	1.8691	1.92346
Jinshan	35.15	27.36	1.18715	1.31355	1.50181	1.591	1.29393	1.12233	1.17061	1.19896	1.21903	1.07364	0.460264	0.354312	0.306843	0.278276	0.613686	1.06116	1.0853	1.09948	1.10951	1.03682	1.94236	1.9214	1.90952	1.9013	1.96449
Nanjing	418.07	311.11	1.50127	1.61994	1.77369	1.82694	1.73536	1.37575	1.41803	1.4424	1.45944	1.33207	0.0369963	0.0284797	0.0246642	0.0223679	0.0493283	1.18787	1.20901	1.2212	1.22972	1.16604	1.84184	1.82712	1.81887	1.81319	1.85761
Jiangning	91.62	41.85	1.49594	1.67717	1.96155	2.06983	1.94878	1.33494	1.38862	1.42001	1.44216	1.28052	0.103623	0.0797691	0.0690821	0.0626505	0.138164	1.16747	1.19431	1.21001	1.22108	1.14026	1.85655	1.8373	1.82644	1.81895	1.87699
Jiangpu	50.94	15.84	1.57356	1.84204	2.36633	2.58717	2.59414	1.35616	1.42026	1.45815	1.48507	1.29203	0.126876	0.0976691	0.0845839	0.0767091	0.169168	1.17808	1.21013	1.22907	1.24253	1.14602	1.84884	1.82636	1.81362	1.80481	1.87259
Liuhe	34.78	16.17	1.35377	1.55417	1.92222	2.08879	1.87473	1.22015	1.27761	1.31157	1.33569	1.16266	0.277839	0.21388	0.185226	0.167981	0.370452	1.11008	1.13881	1.15578	1.16784	1.08133	1.90084	1.87811	1.86521	1.85628	1.92479
Lishui	53.97	21.04	1.48829	1.70832	2.10041	2.26172	2.15018	1.31185	1.37083	1.40557	1.4302	1.25258	0.150135	0.115574	0.10009	0.0907718	0.20018	1.15592	1.18541	1.20279	1.2151	1.12629	1.86511	1.84359	1.8314	1.82298	1.88787
Gaochun	37.98	11.32	1.55563	1.8551	2.50754	2.80718	2.95935	1.33207	1.3991	1.4389	1.46727	1.2654	0.163109	0.125561	0.108739	0.0986158	0.217479	1.16603	1.19955	1.21945	1.23363	1.1327	1.85761	1.83365	1.82004	1.81061	1.88285
Wuxi	192.22	149.01	1.42442	1.5477	1.71236	1.77275	1.65295	1.30841	1.35243	1.37791	1.39578	1.2632	0.0838224	0.0645265	0.0558816	0.050679	0.111763	1.1542	1.17621	1.18896	1.19789	1.1316	1.8664	1.85019	1.84107	1.8348	1.8837
Jiangyin	199.15	95.17	1.55599	1.71556	1.94524	2.02653	1.93218	1.39503	1.44483	1.47376	1.49409	1.34409	0.0498748	0.0383937	0.0332499	0.0301543	0.0664998	1.19752	1.22242	1.23688	1.24704	1.17204	1.83506	1.81805	1.80849	1.8019	1.85321
Yixing	78.15	38.09	1.45636	1.63317	1.91188	2.02046	1.88122	1.30612	1.35941	1.3906	1.41262	1.25215	0.129627	0.0997868	0.0864179	0.0783724	0.172836	1.15306	1.1797	1.1953	1.20631	1.12607	1.86726	1.84767	1.83661	1.82897	1.88804
Changzhou	275.72	205.62	1.46706	1.58959	1.75127	1.80877	1.7044	1.34431	1.38774	1.41283	1.43041	1.29959	0.0562174	0.0432762	0.0374783	0.033989	0.0749565	1.17216	1.19387	1.20642	1.2152	1.1498	1.85313	1.83761	1.8289	1.82291	1.86972
Liyang	64.27	18.95	1.62194	1.88782	2.38681	2.58778	2.59403	1.39327	1.45706	1.49468	1.52137	1.32928	0.095353	0.0734028	0.0635687	0.0576504	0.127137	1.19663	1.22853	1.24734	1.26068	1.16464	1.83568	1.81398	1.80171	1.79322	1.85864
Jintan	46.87	19.69	1.44024	1.65167	2.0299	2.18974	2.04546	1.2794	1.33759	1.37189	1.39622	1.221	0.186293	0.143409	0.124196	0.112633	0.248391	1.1397	1.1688	1.18595	1.19811	1.1105	1.87742	1.85558	1.84321	1.83465	1.90049
Suzhou	180.47	197.1	1.33872	1.44189	1.57258	1.62247	1.4911	1.24925	1.28981	1.31326	1.32968	1.20748	0.125782	0.096827	0.0838547	0.0760478	0.167709	1.12462	1.14491	1.15663	1.16484	1.10374	1.88919	1.87343	1.86458	1.85849	1.90601
Changshu	127.81	58.6	1.52899	1.70203	1.9633	2.05924	1.9528	1.3654	1.4176	1.44804	1.46947	1.31227	0.0745607	0.0573968	0.0497071	0.0450794	0.0994142	1.1827	1.2088	1.22402	1.23474	1.15613	1.84552	1.82727	1.81698	1.80989	1.86495
Zhangjiagang	112.34	70.19	1.42405	1.56908	1.77754	1.85654	1.71831	1.29616	1.34444	1.37255	1.39232	1.24692	0.115597	0.088987	0.077065	0.0698902	0.15413	1.14808	1.17222	1.18627	1.19616	1.12346	1.87102	1.85308	1.84298	1.83601	1.89011
Kunshan	79.94	62.45	1.32063	1.44882	1.62883	1.70148	1.52536	1.22236	1.26866	1.29564	1.31463	1.17519	0.203117	0.156359	0.135411	0.122804	0.270823	1.11118	1.13433	1.14782	1.15732	1.0876	1.89995	1.88158	1.87122	1.86407	1.91946
Wujiang	34.46	18.73	1.29605	1.46991	1.76985	1.90649	1.64543	1.18699	1.24144	1.27357	1.29636	1.13237	0.32783	0.252364	0.218554	0.198206	0.437107	1.09349	1.12072	1.13678	1.14818	1.06618	1.9145	1.89228	1.87967	1.87094	1.93792
Taicang	55.76	38.82	1.30004	1.44018	1.64879	1.73668	1.52773	1.20154	1.25042	1.27903	1.29922	1.15203	0.259509	0.19977	0.173006	0.156899	0.346012	1.10077	1.12521	1.13951	1.14961	1.07601	1.90845	1.88872	1.87757	1.86986	1.92936
Nantong	226.23	114.53	1.55005	1.70234	1.91745	1.99309	1.89895	1.3946	1.44316	1.47133	1.4911	1.34484	0.0465115	0.0358046	0.0310077	0.0281209	0.0620154	1.1973	1.22158	1.23567	1.24555	1.17242	1.83521	1.81861	1.80928	1.80286	1.85294
Hai'an	57.21	29.97	1.39154	1.56487	1.84423	1.95866	1.78262	1.25784	1.31115	1.34243	1.36455	1.20401	0.19032	0.146509	0.12688	0.115068	0.25376	1.12892	1.15558	1.17122	1.18228	1.102	1.8858	1.86537	1.85381	1.84583	1.90744
Rudong	31.38	14.23	1.3444	1.55149	1.9457	2.12931	1.90834	1.2114	1.26979	1.30435	1.32893	1.1531	0.300359	0.231217	0.200239	0.181597	0.400479	1.1057	1.13489	1.15218	1.16447	1.07655	1.9044	1.88114	1.86792	1.85876	1.92889
Haimen	44.87	15.53	1.51136	1.7628	2.25057	2.46037	2.4092	1.31687	1.37934	1.41627	1.44252	1.2544	0.160325	0.123418	0.106883	0.0969324	0.213767	1.15843	1.18967	1.20814	1.22126	1.1272	1.86323	1.84057	1.82772	1.81883	1.88715
Qidong	51.45	20.26	1.47804	1.69798	2.09248	2.25625	2.13959	1.30422	1.36324	1.39803	1.42269	1.24495	0.159078	0.122458	0.106052	0.0961786	0.212104	1.15211	1.18162	1.19901	1.21134	1.12248	1.86797	1.8463	1.83402	1.82553	1.89089
Rugao	53.01	23.25	1.44196	1.64268	1.98831	2.13093	1.9829	1.28484	1.34163	1.37505	1.39871	1.22769	0.171969	0.132382	0.114646	0.103972	0.229292	1.14242	1.17081	1.18752	1.19936	1.11385	1.87534	1.85411	1.84209	1.83378	1.89779
Yangzhou	154.09	75.57	1.52611	1.68841	1.92611	2.01216	1.90698	1.36903	1.41949	1.44886	1.46951	1.31753	0.0661519	0.0509238	0.0441013	0.0399954	0.0882025	1.18452	1.20975	1.22443	1.23475	1.15876	1.84423	1.82662	1.81671	1.80988	1.86299
Jiangdu	85.12	31.05	1.56601	1.78005	2.13824	2.27528	2.19184	1.37378	1.43168	1.46564	1.48964	1.3153	0.0890718	0.0685675	0.0593812	0.0538528	0.118762	1.18689	1.21584	1.23282	1.24482	1.15765	1.84254	1.82248	1.81115	1.80333	1.86382
Yizheng	49.05	24.37	1.3866	1.56985	1.87715	2.00619	1.82206	1.2502	1.30502	1.33726	1.36009	1.19499	0.210533	0.162068	0.140355	0.127288	0.28071	1.1251	1.15251	1.16863	1.18005	1.0975	1.88881	1.86767	1.8557	1.84742	1.91116
Taizhou	169.03	70.61	1.58278	1.75881	2.02175	2.11551	2.02753	1.40716	1.45953	1.49002	1.51147	1.35375	0.0513666	0.039542	0.0342444	0.0310562	0.0684887	1.20358	1.22977	1.24501	1.25573	1.17687	1.83085	1.81316	1.80321	1.79635	1.84971
Jiangyan (Tai)	80.58	24.98	1.62298	1.86631	2.29531	2.46112	2.42567	1.40405	1.46536	1.50141	1.52693	1.34228	0.0799613	0.0615542	0.0533075	0.0483446	0.106615	1.20202	1.23268	1.25071	1.26347	1.17114	1.83193	1.81124	1.79955	1.79147	1.85387
Taixing	65.96	23.77	1.54313	1.76918	2.16591	2.32364	2.24155	1.35073	1.41021	1.4452	1.46998	1.29086	0.113556	0.0874154	0.0757039	0.0686559	0.151408	1.17537	1.20511	1.2226	1.23499	1.14543	1.8508	1.8298	1.81793	1.80972	1.87303
Jingjiang	78.59	28.23	1.56349	1.783	2.15666	2.30124	2.22083	1.36926	1.42786	1.46227	1.48661	1.31014	0.0949988	0.0731301	0.0633325	0.0574363	0.126665	1.18463	1.21393	1.23114	1.2433	1.15507	1.84415	1.82377	1.81226	1.80431	1.86575
Zhenjiang	186.67	67.51	1.63617	1.82469	2.11056	2.21119	2.14045	1.44328	1.49734	1.52882	1.55097	1.38817	0.0402681	0.0309984	0.0268454	0.0243461	0.0536908	1.22164	1.24867	1.26441	1.27549	1.19408	1.81857	1.80085	1.79088	1.78401	1.83746
Jurong	33.42	10.06	1.53267	1.83911	2.53716	2.87201	3.10073	1.31361	1.38124	1.42148	1.45019	1.24649	0.187209	0.144114	0.124806	0.113187	0.249612	1.1568	1.19062	1.21074	1.22509	1.12324	1.86445	1.8399	1.82594	1.81626	1.89028
Yangzhong	45.72	12.25	1.62987	1.94469	2.61908	2.91691	3.11944	1.38004	1.44845	1.48903	1.51792	1.31191	0.121805	0.0937656	0.0812034	0.0736433	0.162407	1.19002	1.22422	1.24451	1.25896	1.15596	1.84032	1.81684	1.80353	1.79431	1.86508
Danyang	67.58	33.02	1.4373	1.61677	1.90498	2.0196	1.86936	1.29019	1.34402	1.37558	1.39788	1.23576	0.150274	0.115681	0.100182	0.0908554	0.200365	1.14509	1.17201	1.18779	1.19894	1.11788	1.87329	1.85323	1.8419	1.83407	1.89455
Hangzhou	184.77	200.66	1.34249	1.44591	1.57694	1.62681	1.49668	1.25221	1.29279	1.31624	1.33266	1.21044	0.122163	0.0940411	0.081442	0.0738597	0.162884	1.12611	1.14639	1.15812	1.16633	1.10522	1.88802	1.8723	1.86347	1.85739	1.9048
Tonglu	30.32	7.43	1.62757	2.01993	3.08359	3.65692	5.1839	1.35396	1.4281	1.47242	1.50414	1.28085	0.167986	0.129315	0.11199	0.101564	0.223981	1.17698	1.21405	1.23621	1.25207	1.14042	1.84963	1.82369	1.80892	1.79868	1.87687
Fuyang	83.71	55.75	1.37046	1.51264	1.71918	1.80066	1.63716	1.25508	1.30342	1.33161	1.35147	1.20591	0.165361	0.127295	0.11024	0.099977	0.220481	1.12754	1.15171	1.16581	1.17574	1.10295	1.88689	1.86828	1.85778	1.85053	1.90666
Lin'an	34.92	16.25	1.35415	1.5543	1.92143	2.08741	1.87367	1.2205	1.27792	1.31186	1.33596	1.16303	0.276979	0.213218	0.184653	0.167461	0.369305	1.11025	1.13896	1.15593	1.16798	1.08152	1.9007	1.87799	1.86511	1.85618	1.92463
Yuhang	40.72	17.88	1.40196	1.60935	1.98553	2.14939	1.97742	1.25272	1.31066	1.34486	1.36913	1.19464	0.224127	0.172533	0.149418	0.135507	0.298836	1.12636	1.15533	1.17243	1.18457	1.09732	1.88782	1.86555	1.85293	1.84419	1.91131
Xiaoshan	178.18	96.49	1.51086	1.66169	1.87626	1.9534	1.84691	1.36324	1.41182	1.44003	1.45985	1.31354	0.0631693	0.0486278	0.0421129	0.0381922	0.0842258	1.18162	1.20591	1.22001	1.22992	1.15677	1.8463	1.82925	1.81966	1.81306	1.86448
Ningbo	219.05	193.81	1.40589	1.52007	1.66858	1.72309	1.6051	1.29846	1.34071	1.36514	1.38224	1.25496	0.0839521	0.0646264	0.0559681	0.0507574	0.111936	1.14923	1.17036	1.18257	1.19112	1.12748	1.87015	1.85444	1.84562	1.83954	1.88693
Xiangshan	20.01	7.39	1.33771	1.60983	2.30442	2.70834	2.90353	1.19032	1.25557	1.29458	1.3225	1.12597	0.383612	0.295305	0.255741	0.231932	0.511483	1.09516	1.12778	1.14729	1.16125	1.06299	1.91311	1.8867	1.87162	1.86114	1.94074
Ninghai	23.07	12.51	1.21297	1.38707	1.71372	1.88256	1.48786	1.12882	1.18455	1.2176	1.24113	1.07329	0.488544	0.376082	0.325696	0.295374	0.651392	1.06441	1.09227	1.1088	1.12056	1.03665	1.93949	1.91552	1.90188	1.89241	1.96465
Yuyao	157.04	63.83	1.58531	1.76613	2.03954	2.13756	2.05046	1.40645	1.45956	1.4905	1.51228	1.35235	0.0537955	0.0414118	0.0358637	0.0325248	0.0717274	1.20323	1.22978	1.24525	1.25614	1.17617	1.8311	1.81315	1.80305	1.79609	1.85022
Cixi	146.38	67.35	1.54059	1.71021	1.96271	2.05426	1.95263	1.37662	1.4282	1.45824	1.47938	1.32404	0.0653305	0.0502914	0.0435537	0.0394988	0.0871073	1.18831	1.2141	1.22912	1.23969	1.16202	1.84153	1.82365	1.81359	1.80665	1.86057
Fenghua	82.31	18.95	1.75288	2.05602	2.63582	2.86312	2.97644	1.47606	1.54364	1.5835	1.61178	1.40827	0.0581361	0.0447532	0.0387574	0.0351491	0.0775148	1.23803	1.27182	1.29175	1.30589	1.20414	1.80773	1.78627	1.77414	1.76576	1.83047
Jiaxing	98.29	67.29	1.383	1.52132	1.71847	1.7949	1.64228	1.26682	1.31429	1.34194	1.36139	1.21842	0.144768	0.111443	0.0965123	0.0875269	0.193025	1.13341	1.15714	1.17097	1.1807	1.10921	1.88229	1.8642	1.85399	1.84696	1.90154
Jiashan	45.71	23.27	1.36727	1.54807	1.85237	1.98203	1.78411	1.23672	1.29138	1.32354	1.34632	1.18172	0.231481	0.178194	0.154321	0.139954	0.308642	1.11836	1.14569	1.16177	1.17316	1.09086	1.89417	1.87284	1.86076	1.8524	1.91671
Haiyan	29.12	21.49	1.16418	1.29426	1.49532	1.59507	1.24891	1.10506	1.15456	1.18372	1.20438	1.0553	0.526739	0.405484	0.351159	0.318466	0.702319	1.05253	1.07728	1.09186	1.10219	1.02765	1.95009	1.92826	1.91587	1.90729	1.97309
Haining	57.09	23.34	1.47775	1.68774	2.05236	2.20077	2.07651	1.30801	1.36579	1.39979	1.42387	1.24987	0.148841	0.114578	0.0992273	0.0899892	0.198455	1.15401	1.1829	1.19989	1.21193	1.12494	1.86655	1.84538	1.83341	1.82513	1.88894
Pinghu	40.35	24.78	1.28439	1.44004	1.69012	1.80091	1.55262	1.18432	1.23611	1.26656	1.28812	1.13216	0.316341	0.24352	0.210894	0.19126	0.421789	1.09216	1.11805	1.13328	1.14406	1.06608	1.91562	1.89441	1.88239	1.87408	1.93802
Tongxiang	43.68	34.34	1.22483	1.35203	1.53794	1.62153	1.36834	1.14965	1.19732	1.22526	1.24499	1.10142	0.374091	0.287975	0.249394	0.226175	0.498788	1.07482	1.09866	1.11263	1.1225	1.05071	1.93039	1.9102	1.89877	1.89087	1.95174
Huzhou	50.59	30.15	1.33162	1.48991	1.7394	1.84472	1.63667	1.21848	1.27008	1.30035	1.32175	1.16638	0.24485	0.188485	0.163233	0.148036	0.326466	1.10924	1.13504	1.15017	1.16088	1.08319	1.90152	1.88103	1.86943	1.86142	1.9232
Deqing	33.88	22.52	1.22702	1.37203	1.60311	1.71089	1.41552	1.14589	1.19682	1.22679	1.24803	1.09467	0.407778	0.313907	0.271852	0.246542	0.543704	1.07295	1.09841	1.1134	1.12401	1.04734	1.93201	1.91041	1.89815	1.88967	1.9548
Changxing	43.68	23.24	1.3449	1.51983	1.81199	1.9379	1.72499	1.22228	1.27631	1.3081	1.33062	1.16791	0.25317	0.194891	0.16878	0.153067	0.33756	1.11114	1.13815	1.15405	1.16531	1.08396	1.89998	1.87862	1.86651	1.85814	1.92255
Anji	50.29	23.14	1.4172	1.61163	1.94444	2.08323	1.91866	1.26877	1.32489	1.35792	1.38131	1.21229	0.19017	0.146393	0.12678	0.114977	0.25356	1.13438	1.16245	1.17896	1.19066	1.10615	1.88154	1.86025	1.84821	1.83987	1.90404
Shaoxing	142.19	57.23	1.58006	1.76467	2.04728	2.14949	2.06094	1.40007	1.45378	1.48511	1.50717	1.34542	0.0588339	0.0452903	0.0392226	0.035571	0.0784452	1.20004	1.22689	1.24255	1.25359	1.17271	1.83331	1.81507	1.80479	1.79771	1.85273
Chengxian	28.06	8.08	1.52799	1.86471	2.71912	3.16826	3.8482	1.30156	1.3716	1.41342	1.44331	1.23237	0.213294	0.164194	0.142196	0.128957	0.284392	1.15078	1.1858	1.20671	1.22165	1.11618	1.86897	1.84331	1.8287	1.81856	1.89591
Xinchang	28.05	7.86	1.54229	1.88933	2.78628	3.26286	4.10315	1.30847	1.37928	1.42158	1.45183	1.23855	0.207634	0.159837	0.138423	0.125536	0.276845	1.15424	1.18964	1.21079	1.22591	1.11928	1.86637	1.84059	1.82591	1.81572	1.89343
Zhuji	110.29	65.86	1.43476	1.58414	1.80116	1.88329	1.74689	1.30249	1.35145	1.37997	1.40004	1.25259	0.112536	0.0866302	0.075024	0.0680392	0.150048	1.15124	1.17572	1.18998	1.20002	1.12629	1.86863	1.85054	1.84035	1.83332	1.88787
Shangyu	72.33	28.77	1.51687	1.72352	2.07063	2.20659	2.09924	1.33924	1.39638	1.42992	1.45364	1.28157	0.1143	0.0879879	0.0761997	0.0691055	0.152399	1.16962	1.19819	1.21496	1.22682	1.14079	1.85498	1.83459	1.82307	1.81511	1.87659
Zhoushan	47.78	14.76	1.56875	1.84278	2.3888	2.62247	2.64693	1.35051	1.41517	1.45343	1.48062	1.28591	0.13438	0.103446	0.0895869	0.0812464	0.179174	1.17526	1.20759	1.22671	1.24031	1.14295	1.85088	1.8281	1.81519	1.80625	1.87493
Avearage	103.493	69.7997	1.44943	1.64297	1.99007	2.14082	2.07398	1.29602	1.35078	1.38295	1.40572	1.2408	0.172772	0.133	0.115182	0.104458	0.230363	1.14801	1.17539	1.19148	1.20286	1.1204	1.87217	1.85186	1.84036	1.83242	1.89368

## Sheet: Koch island
Step	Measure in 2005		Fractal dimension 1					Fractal dimension 2					Shape index
m	P	A	Triangle	Square	Hexagon	Circle	Hexagram	Triangle	Square	Hexagon	Circle	Hexagram	Triangle	Square	Hexagon	Circle	Hexagram
1	3	0.433013	0	0.687422	0.773706	0.746085	1.11577	1	1.13516	1.22629	1.29704	0.884228	1	0.7698	0.666667	0.6046	1.33333
2	4	0.57735	2	0	0.539155	0.533144	1	1.11577	1.24707	1.33333	1.39908	1	0.75	0.57735	0.5	0.45345	1
3	5.33333	0.6415	2.92774	-1.29602	0.168416	0.206336	0.775318	1.29251	1.43773	1.53238	1.60413	1.16331	0.46875	0.360844	0.3125	0.283406	0.625
4	7.11111	0.670011	3.95414	-2.87351	-0.250731	-0.160215	0.51089	1.48963	1.65392	1.76069	1.84145	1.34294	0.275391	0.211996	0.183594	0.166501	0.367188
5	9.48148	0.682683	5.05522	-4.52183	-0.684748	-0.53911	0.232126	1.69602	1.88161	2.00206	2.09309	1.53008	0.157837	0.121503	0.105225	0.0954282	0.210449
6	12.642	0.688315	6.20701	-6.16172	-1.12215	-0.920996	-0.0515636	1.90703	2.115	2.24989	2.3518	1.72096	0.0895157	0.0689092	0.0596771	0.0541212	0.119354
7	16.856	0.690818	7.39053	-7.77773	-1.55957	-1.30308	-0.336801	2.12038	2.35127	2.50099	2.61408	1.91375	0.0505357	0.0389024	0.0336905	0.0305539	0.0673809
8	22.4746	0.69193	8.59269	-9.37406	-1.99635	-1.68475	-0.622442	2.33492	2.589	2.75374	2.87817	2.1075	0.0284721	0.0219178	0.0189814	0.0172142	0.0379628
9	29.9662	0.692425	9.80527	-10.9577	-2.43254	-2.066	-0.908136	2.55006	2.82746	3.00732	3.14316	2.30175	0.016027	0.0123376	0.0106847	0.00968992	0.0213693
10	39.9549	0.692645	11.0235	-12.5339	-2.86835	-2.44697	-1.1938	2.76549	3.06629	3.26132	3.40861	2.49623	0.00901805	0.0069421	0.00601203	0.00545231	0.0120241
11	53.2732	0.692742	12.2446	-14.106	-3.30392	-2.82778	-1.47942	2.98107	3.3053	3.51552	3.67428	2.69083	0.00507337	0.00390548	0.00338224	0.00306736	0.00676449
12	71.0309	0.692786	13.4673	-15.676	-3.73936	-3.20849	-1.76501	3.19672	3.54439	3.76981	3.94005	2.88549	0.00285395	0.00219697	0.00190263	0.0017255	0.00380526
13	94.7079	0.692805	14.6907	-17.2449	-4.17474	-3.58914	-2.05059	3.41241	3.78353	4.02415	4.20588	3.08018	0.00160539	0.00123583	0.00107026	0.000970619	0.00214052
14	126.277	0.692813	15.9145	-18.8133	-4.61008	-3.96977	-2.33615	3.62811	4.02269	4.27852	4.47173	3.27488	0.000903043	0.000695163	0.000602029	0.00054598	0.00120406
15	168.37	0.692817	17.1385	-20.3814	-5.0454	-4.35039	-2.62171	3.84382	4.26186	4.5329	4.73759	3.46959	0.000507965	0.000391031	0.000338643	0.000307115	0.000677286
16	224.493	0.692819	18.3626	-21.9493	-5.48071	-4.731	-2.90727	4.05953	4.50103	4.78728	5.00346	3.66431	0.000285731	0.000219956	0.000190487	0.000172753	0.000380974
17	299.324	0.69282	19.5867	-23.5172	-5.91601	-5.11161	-3.19283	4.27525	4.7402	5.04167	5.26934	3.85902	0.000160724	0.000123725	0.000107149	9.71735e-05	0.000214298
18	399.098	0.69282	20.8109	-25.085	-6.35132	-5.49221	-3.47838	4.49096	4.97938	5.29605	5.53521	4.05373	9.04071e-05	6.95955e-05	6.02714e-05	5.46601e-05	0.000120543
19	532.131	0.69282	22.0351	-26.6529	-6.78662	-5.87282	-3.76394	4.70668	5.21856	5.55044	5.80109	4.24845	5.0854e-05	3.91475e-05	3.39027e-05	3.07463e-05	6.78054e-05
20	709.508	0.69282	23.2592	-28.2207	-7.22193	-6.25342	-4.04949	4.92239	5.45773	5.80483	6.06696	4.44316	2.86054e-05	2.20204e-05	1.90703e-05	1.72948e-05	3.81405e-05
21	946.011	0.69282	24.4834	-29.7885	-7.65723	-6.63403	-4.33504	5.13811	5.69691	6.05921	6.33284	4.63788	1.60905e-05	1.23865e-05	1.0727e-05	9.72833e-06	2.1454e-05
22	1261.35	0.69282	25.7076	-31.3563	-8.09253	-7.01463	-4.6206	5.35382	5.93609	6.3136	6.59871	4.83259	9.05093e-06	6.96741e-06	6.03395e-06	5.47219e-06	1.20679e-05
23	1681.8	0.69282	26.9317	-32.9241	-8.52784	-7.39523	-4.90615	5.56954	6.17526	6.56799	6.86459	5.02731	5.09115e-06	3.91917e-06	3.3941e-06	3.07811e-06	6.78819e-06
24	2242.4	0.69282	28.1559	-34.4919	-8.96314	-7.77584	-5.19171	5.78526	6.41444	6.82238	7.13046	5.22202	2.86377e-06	2.20453e-06	1.90918e-06	1.73143e-06	3.81836e-06
25	2989.86	0.69282	29.3801	-36.0598	-9.39844	-8.15644	-5.47726	6.00097	6.65362	7.07676	7.39634	5.41673	1.61087e-06	1.24005e-06	1.07391e-06	9.73932e-07	2.14783e-06
26	3986.48	0.69282	30.6042	-37.6276	-9.83374	-8.53704	-5.76282	6.21669	6.89279	7.33115	7.66221	5.61145	9.06115e-07	6.97527e-07	6.04076e-07	5.47837e-07	1.20815e-06
27	5315.31	0.69282	31.8284	-39.1954	-10.269	-8.91765	-6.04837	6.43241	7.13197	7.58554	7.92809	5.80616	5.09689e-07	3.92359e-07	3.39793e-07	3.08158e-07	6.79586e-07
28	7087.08	0.69282	33.0526	-40.7632	-10.7044	-9.29825	-6.33392	6.64812	7.37114	7.83993	8.19396	6.00088	2.867e-07	2.20702e-07	1.91134e-07	1.73339e-07	3.82267e-07
29	9449.44	0.69282	34.2767	-42.331	-11.1397	-9.67886	-6.61948	6.86384	7.61032	8.09431	8.45984	6.19559	1.61269e-07	1.24145e-07	1.07513e-07	9.75032e-08	2.15025e-07
30	12599.2	0.69282	35.5009	-43.8988	-11.575	-10.0595	-6.90503	7.07955	7.8495	8.3487	8.72571	6.39031	9.07138e-08	6.98315e-08	6.04759e-08	5.48455e-08	1.20952e-07
